# Supplementary material for: Alterations in Gut Microbiota Correlate With Hematological Injuries Induced by Radiation in Beagles
Source: PubMed Central journal article supplement (PMC11631345; doi:10.1155/ijm/3096783), 2024-12-03

# Co-occurrence network

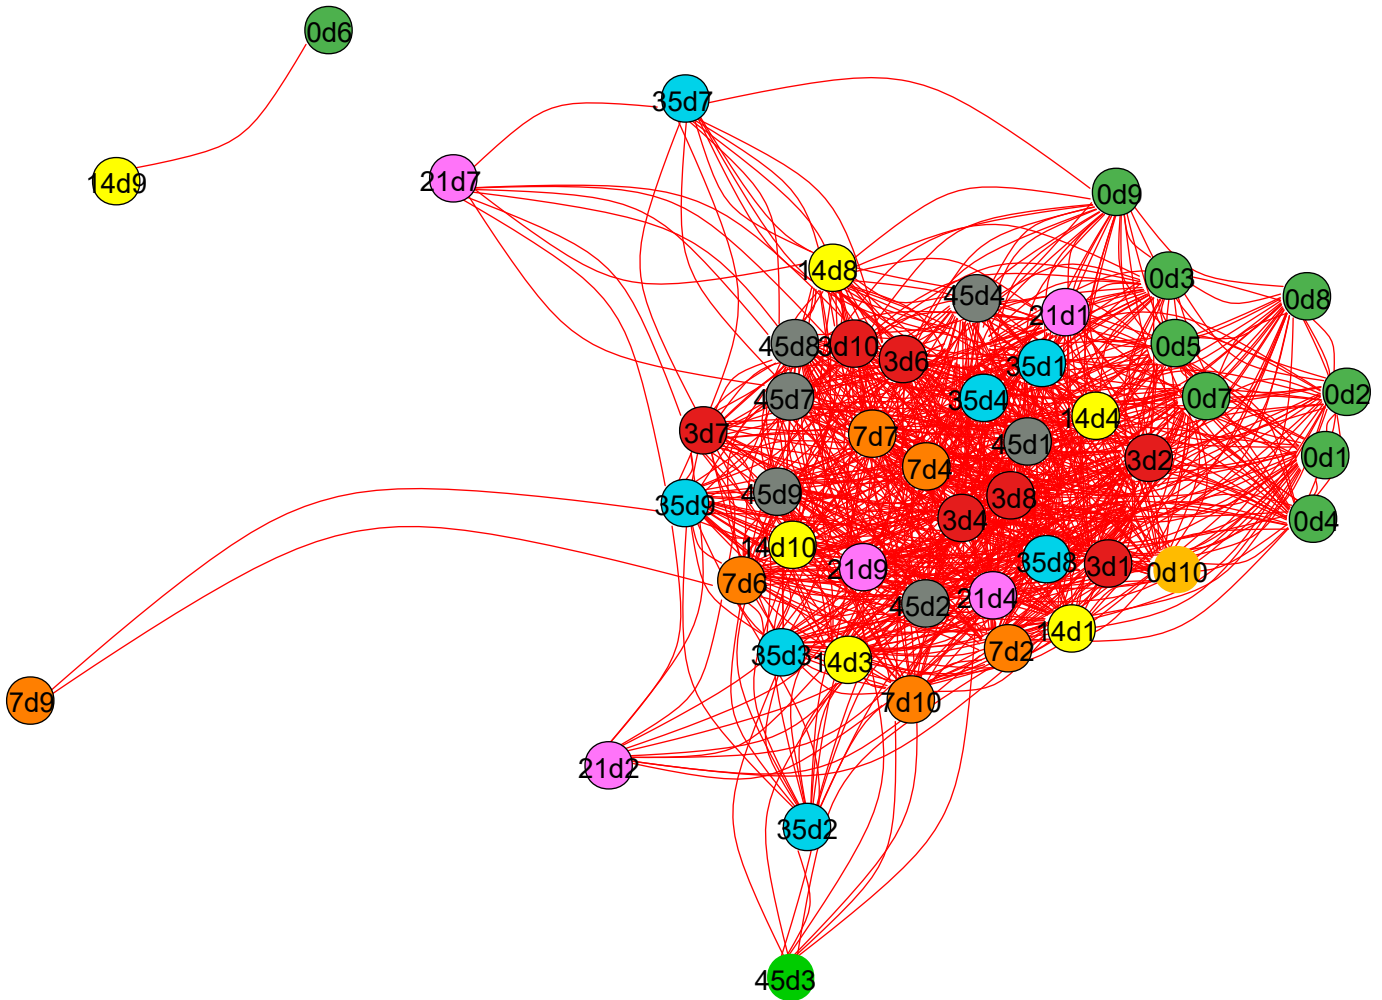

Supplement: 3096783.f1.pdf [file 3096783.f1.pdf]
