# Supplementary material for: Alterations in Gut Microbiota Correlate With Hematological Injuries Induced by Radiation in Beagles
Source: PubMed Central journal article supplement (PMC11631345; doi:10.1155/ijm/3096783), 2024-12-03
Supplement: 3096783.f4.pdf [file 3096783.f4.pdf]

| Seq. | Sample ID | Analysis | RBC (M/uL) | HGB (g/dL) | HCT (%) | MCV (fL) | MCH (pg) | MCHC (g/dL) |
|------|-----------|----------|------------|------------|---------|----------|----------|-------------|
| 0d   | 0d1       | WB       | 7.16       | 15.3       | 44.6    | 62.3     | 21.4     | 34.3        |
| 0d   | 0d2       | WB       | 8.02       | 18.9       | 55.9    | 69.7     | 23.6     | 33.8        |
| 0d   | 0d3       | WB       | 7.77       | 17.3       | 51.2    | 65.9     | 22.3     | 33.8        |
| 0d   | 0d4       | WB       | 8.26       | 18.1       | 53.8    | 65.1     | 21.9     | 33.6        |
| 0d   | 0d5       | WB       | 8.45       | 18.6       | 56.7    | 67.1     | 22       | 32.8        |
| 0d   | 0d6       | WB       | 7.89       | 17.9       | 51.7    | 65.5     | 22.7     | 34.6        |
| 0d   | 0d7       | WB       | 8.64       | 17.9       | 52.2    | 60.4     | 20.7     | 34.3        |
| 0d   | 0d8       | WB       | 7.6        | 16.7       | 49.8    | 65.5     | 22       | 33.5        |
| 0d   | 0d9       | WB       | 7.99       | 17         | 51.3    | 64.2     | 21.3     | 33.1        |
| 0d   | 0d10      | WB       | 7.81       | 17.8       | 52.6    | 67.3     | 22.8     | 33.8        |
| 7d   | 7d1       | WB       | 7.82       | 17.8       | 52      | 66.5     | 22.8     | 34.2        |
| 7d   | 7d2       | WB       | 8.17       | 16.8       | 51      | 62.4     | 20.6     | 32.9        |
| 7d   | 7d3       | WB       | 6.85       | 14.8       | 44.5    | 65       | 21.6     | 33.3        |
| 7d   | 7d4       | WB       | 6.96       | 16         | 47.1    | 67.7     | 23       | 34          |
| 7d   | 7d5       | WB       | 6.35       | 14.7       | 43.3    | 68.2     | 23.1     | 33.9        |
| 7d   | 7d6       | WB       | 7.49       | 16.5       | 49.5    | 66.1     | 22       | 33.3        |
| 7d   | 7d7       | WB       | 7.25       | 15.6       | 46.1    | 63.6     | 21.5     | 33.8        |
| 7d   | 7d8       | WB       | 6.42       | 14.4       | 42      | 65.4     | 22.4     | 34.3        |
| 7d   | 7d9       | WB       | 7.99       | 17.4       | 50.4    | 63.1     | 21.8     | 34.5        |
| 7d   | 7d10      | WB       | 7.91       | 16.8       | 50.2    | 63.5     | 21.2     | 33.5        |
| 14d  | 14d1      | WB       | 7.45       | 17.3       | 48.4    | 65       | 23.2     | 35.7        |
| 14d  | 14d2      | WB       | 7.26       | 15.4       | 44.6    | 61.4     | 21.2     | 34.5        |
| 14d  | 14d3      | WB       | 6.32       | 13.9       | 39.7    | 62.8     | 22       | 35          |
| 14d  | 14d4      | WB       | 6.72       | 15.7       | 44.7    | 66.5     | 23.4     | 35.1        |
| 14d  | 14d5      | WB       | 6.31       | 14.3       | 40.6    | 64.3     | 22.7     | 35.2        |
| 14d  | 14d6      | WB       | 7.12       | 16         | 45.9    | 64.5     | 22.5     | 34.9        |
| 14d  | 14d7      | WB       | 6.12       | 13.9       | 39.6    | 64.7     | 22.7     | 35.1        |
| 14d  | 14d8      | WB       | 7.42       | 16.4       | 45.9    | 61.9     | 22.1     | 35.7        |
| 14d  | 14d9      | WB       | 7.98       | 17.5       | 50.8    | 63.7     | 21.9     | 34.4        |
| 21d  | 21d1      | WB       | 6.46       | 13.6       | 39.4    | 61       | 21.1     | 34.5        |
| 21d  | 21d2      | WB       | 4.85       | 10.6       | 30.3    | 62.5     | 21.9     | 35          |
| 21d  | 21d3      | WB       | 5.61       | 13         | 37.1    | 66.1     | 23.2     | 35          |
| 21d  | 21d4      | WB       | 5.58       | 12.6       | 35.5    | 63.6     | 22.6     | 35.5        |
| 21d  | 21d5      | WB       | 6.61       | 14.6       | 42.5    | 64.3     | 22.1     | 34.4        |
| 21d  | 21d6      | WB       | 5.77       | 13.6       | 38.3    | 66.4     | 23.6     | 35.5        |
| 21d  | 21d7      | WB       | 7.44       | 16.1       | 46.5    | 62.5     | 21.6     | 34.6        |
| 21d  | 21d8      | WB       | 7.38       | 16.1       | 47.3    | 64.1     | 21.8     | 34          |
| 35d  | 35d1      | WB       | 7.21       | 15.1       | 47.5    | 65.9     | 20.9     | 31.8        |
| 35d  | 35d2      | WB       | 6.4        | 13.6       | 44.2    | 69.1     | 21.3     | 30.8        |
| 35d  | 35d3      | WB       | 6.41       | 14.9       | 45.5    | 71       | 23.2     | 32.7        |
| 35d  | 35d4      | WB       | 6.2        | 13.6       | 42.4    | 68.4     | 21.9     | 32.1        |
| 35d  | 35d5      | WB       | 7.14       | 15.9       | 48.4    | 67.8     | 22.3     | 32.9        |
| 35d  | 35d6      | WB       | 5.96       | 13.6       | 41.3    | 69.3     | 22.8     | 32.9        |
| 35d  | 35d7      | WB       | 7.13       | 15.2       | 44.7    | 62.7     | 21.3     | 34          |
| 35d  | 35d8      | WB       | 7.88       | 17.3       | 53.2    | 67.5     | 22       | 32.5        |
| 45d  | 45d1      | WB       | 7.34       | 15.6       | 48.1    | 65.5     | 21.3     | 32.4        |
| 45d  | 45d2      | WB       | 6.3        | 13.4       | 42.3    | 67.1     | 21.3     | 31.7        |
| 45d  | 45d3      | WB       | 6.99       | 16         | 49.2    | 70.4     | 22.9     | 32.5        |
| 45d  | 45d4      | WB       | 6.67       | 14.5       | 45.4    | 68.1     | 21.7     | 31.9        |
| 45d  | 45d5      | WB       | 7.31       | 16         | 47.9    | 65.5     | 21.9     | 33.4        |
| 45d  | 45d6      | WB       | 6.26       | 14         | 42.4    | 67.7     | 22.4     | 33          |
| 45d  | 45d7      | WB       | 7.53       | 16         | 47.7    | 63.3     | 21.2     | 33.5        |
| 45d  | 45d8      | WB       | 8.01       | 18         | 52.2    | 65.2     | 22.5     | 34.5        |

| RDW-SD (fL) | RDW-CV (%) | RBC-I (M/ul) | MCV-I (fL) | RET# (K/ul) | RET% (%) | IRF (%) | LFR (%) | MFR (%) | HFR (%) |
|-------------|------------|--------------|------------|-------------|----------|---------|---------|---------|---------|
| 35.4        | 19         | 7.16         | 62.3       | 103.8       | 1.45     | 35.5    | 64.5    | 22.6    | 12.9    |
| 41.1        | 19.6       | 8.02         | 69.7       | 214.1       | 2.67     | 47      | 53      | 30.7    | 16.3    |
| 39.8        | 20.1       | 7.77         | 65.9       | 134.4       | 1.73     | 43.3    | 56.7    | 19.1    | 24.2    |
| 36.7        | 19.6       | 8.26         | 65.1       | 113.2       | 1.37     | 38.7    | 61.3    | 23.7    | 15      |
| 39.4        | 20         | 8.45         | 67.1       | 156.3       | 1.85     | 40.8    | 59.2    | 31.7    | 9.1     |
| 36.4        | 18.3       | 7.89         | 65.5       | 65.5        | 0.83     | 19.3    | 80.7    | 12.2    | 7.1     |
| 38          | 21.6       | 8.64         | 60.4       | 70          | 0.81     | 21.4    | 78.6    | 15.1    | 6.3     |
| 39.8        | 20.2       | 7.6          | 65.5       | 161.9       | 2.13     | 33.4    | 66.6    | 23.5    | 9.9     |
| 39.5        | 20.7       | 7.99         | 64.2       | 169.4       | 2.12     | 30.2    | 69.8    | 23      | 7.2     |
| 42.6        | 20.8       | 7.81         | 67.3       | 208.5       | 2.67     | 39.3    | 60.7    | 25.8    | 13.5    |
| 35.3        | 18.3       | 7.82         | 66.5       | 4.7         | 0.06     | 0       | 100     | 0       | 0       |
| 37.6        | 20.2       | 8.17         | 62.4       | 5.7         | 0.07     | 0       | 100     | 0       | 0       |
| 37.4        | 18.2       | 6.85         | 65         | 4.8         | 0.07     | 11.2    | 88.8    | 5.6     | 5.6     |
| 38.8        | 17.6       | 6.96         | 67.7       | 9.7         | 0.14     | 6.1     | 93.9    | 0       | 6.1     |
| 36          | 15.8       | 6.35         | 68.2       | 4.4         | 0.07     | 37.5    | 62.5    | 12.5    | 25      |
| 38.1        | 19.5       | 7.49         | 66.1       | 7.5         | 0.1      | 16      | 84      | 4       | 12      |
| 38.5        | 19.6       | 7.25         | 63.6       | 18.1        | 0.25     | 9.8     | 90.2    | 4.9     | 4.9     |
| 34.6        | 17         | 6.42         | 65.4       | 10.3        | 0.16     | 15      | 85      | 5       | 10      |
| 37.8        | 19.9       | 7.99         | 63.1       | 13.6        | 0.17     | 0       | 100     | 0       | 0       |
| 35.6        | 19         | 7.91         | 63.5       | 5.5         | 0.07     | 5.9     | 94.1    | 5.9     | 0       |
| 33.6        | 16.4       | 7.45         | 65         | 11.9        | 0.16     | 35.9    | 64.1    | 20.5    | 15.4    |
| 36.1        | 19.4       | 7.26         | 61.4       | 5.8         | 0.08     | 40      | 60      | 25      | 15      |
| 35.1        | 17.5       | 6.32         | 62.8       | 7           | 0.11     | 33.3    | 66.7    | 11.1    | 22.2    |
| 36.6        | 16.6       | 6.72         | 66.5       | 4           | 0.06     | 35.7    | 64.3    | 14.3    | 21.4    |
| 36.1        | 17.3       | 6.31         | 64.3       | 6.3         | 0.1      | 24      | 76      | 20      | 4       |
| 37.7        | 19.9       | 7.12         | 64.5       | 49.1        | 0.69     | 38.9    | 61.1    | 22.4    | 16.5    |
| 33.8        | 16.5       | 6.12         | 64.7       | 11          | 0.18     | 25      | 75      | 18.2    | 6.8     |
| 35.6        | 18.5       | 7.42         | 61.9       | 0.7         | 0.01     | 0       | 100     | 0       | 0       |
| 35.8        | 20.1       | 7.98         | 63.7       | 89.4        | 1.12     | 39.1    | 60.9    | 26.4    | 12.7    |
| 35.5        | 18.6       | 6.46         | 61         | 7.8         | 0.12     | 30      | 70      | 6.7     | 23.3    |
| 33.6        | 15.8       | 4.85         | 62.5       | 28.1        | 0.58     | 20.3    | 79.7    | 6.3     | 14      |
| 37          | 15.8       | 5.61         | 66.1       | 11.8        | 0.21     | 29.4    | 70.6    | 15.7    | 13.7    |
| 35.4        | 17.6       | 5.58         | 63.6       | 13.4        | 0.24     | 45.7    | 54.3    | 22      | 23.7    |
| 37.7        | 20.4       | 6.61         | 64.3       | 95.8        | 1.45     | 47.5    | 52.5    | 23.9    | 23.6    |
| 33.5        | 18.8       | 5.77         | 66.4       | 35.8        | 0.62     | 43.1    | 56.9    | 23.5    | 19.6    |
| 35.8        | 19         | 7.44         | 62.5       | 11.2        | 0.15     | 26.3    | 73.7    | 18.4    | 7.9     |
| 38          | 21.1       | 7.38         | 64.1       | 98.2        | 1.33     | 29.3    | 70.7    | 22.9    | 6.4     |
| 46.6        | 23.5       | 7.21         | 65.9       | 212.7       | 2.95     | 32.8    | 67.2    | 24.2    | 8.6     |
| 49.1        | 22.6       | 6.4          | 69.1       | 278.4       | 4.35     | 32      | 68      | 25.3    | 6.7     |
| 46.8        | 21.7       | 6.41         | 71         | 222.4       | 3.47     | 36      | 64      | 27.5    | 8.5     |
| 44.9        | 22.6       | 6.2          | 68.4       | 256.7       | 4.14     | 39.3    | 60.7    | 30.3    | 9       |
| 45.6        | 22.3       | 7.14         | 67.8       | 237.8       | 3.33     | 55.8    | 44.2    | 30.9    | 24.9    |
| 42.1        | 21.4       | 5.96         | 69.3       | 168.1       | 2.82     | 40.2    | 59.8    | 28      | 12.2    |
| 40          | 21.4       | 7.13         | 62.7       | 199.6       | 2.8      | 35.7    | 64.3    | 25.6    | 10.1    |
| 45.5        | 22.2       | 7.88         | 67.5       | 154.4       | 1.96     | 27.5    | 72.5    | 22.8    | 4.7     |
| 45.3        | 22.2       | 7.34         | 65.5       | 168.1       | 2.29     | 25.9    | 74.1    | 17.8    | 8.1     |
| 43.8        | 20.8       | 6.3          | 67.1       | 239.4       | 3.8      | 34.5    | 65.5    | 25.3    | 9.2     |
| 45.5        | 20.9       | 6.99         | 70.4       | 288.7       | 4.13     | 46.8    | 53.2    | 30.1    | 16.7    |
| 46.3        | 21.9       | 6.67         | 68.1       | 312.2       | 4.68     | 38      | 62      | 26.9    | 11.1    |
| 41          | 20.8       | 7.31         | 65.5       | 200.3       | 2.74     | 49.7    | 50.3    | 24.4    | 25.3    |
| 42.2        | 20.9       | 6.26         | 67.7       | 172.8       | 2.76     | 43.6    | 56.4    | 28.9    | 14.7    |
| 40.9        | 21.7       | 7.53         | 63.3       | 218.4       | 2.9      | 36.5    | 63.5    | 26.9    | 9.6     |
| 40.7        | 21.3       | 8.01         | 65.2       | 212.3       | 2.65     | 48.6    | 51.4    | 31.2    | 17.4    |

| RBC-O (M/μl) | PLT-O (K/μl) | MCV-O (fL) | MPV-O (fL) | RBC-X (ch) | RBC-Y (ch) | RBC-Z (ch) | PLT (K/μL) | PDW (fL) | MPV (fL) |
|--------------|--------------|------------|------------|------------|------------|------------|------------|----------|----------|
| 7.72         | 322          | 72.2       | 12.8       | 12.7       | 138        | 143.8      | 373        | 14.5     | 11.3     |
| 8.66         | 332          | 76.7       | 13         | 12.9       | 144.9      | 145.6      | 398        | 15.5     | 11.9     |
| 8.31         | 250          | 74.6       | 12.1       | 14.5       | 141.9      | 143.9      | 274        | 15.7     | 12       |
| 9.25         | 84           | 73.4       | 12.4       | 14.2       | 140.2      | 143.8      | 106        | 15.9     | 11.9     |
| 8.99         | 278          | 73.4       | 12.7       | 12.4       | 140        | 143.6      | 309        | 14.3     | 11       |
| 8.52         | 260          | 75.1       | 12.6       | 13.5       | 142.7      | 146        | 283        | 14.5     | 11       |
| 9.25         | 297          | 69.6       | 12.9       | 13.2       | 134.3      | 142.8      | 328        | 15.2     | 11.2     |
| 8.21         | 289          | 74.3       | 13         | 11.4       | 141.4      | 145.4      | 343        | 15.9     | 11.2     |
| 8.53         | 337          | 72.6       | 13.4       | 12.5       | 138.9      | 144.9      | 363        | 15.1     | 11.2     |
| 8.46         | 324          | 77.7       | 13.7       | 13.6       | 146.3      | 147.7      | 343        | 16.2     | 11.8     |
| 8.62         | 22           | 75.9       | 14.4       | 13.6       | 143.8      | 146.2      | 17         | ----     | ----     |
| 8.72         | 134          | 71         | 14.1       | 13.6       | 136.5      | 144.3      | 148        | ----     | ----     |
| 7.31         | 152          | 72.6       | 13.6       | 13         | 139        | 145.1      | 168        | 17.7     | 12       |
| 7.57         | 95           | 77.9       | 13.5       | 14.7       | 146.8      | 148.8      | 97         | 15.6     | 11.7     |
| 6.9          | 79           | 76.7       | 14         | 13.9       | 145.1      | 148        | 69         | 18.5     | 13.2     |
| 8.22         | 149          | 74         | 13.2       | 12.2       | 141        | 147.4      | 149        | 15.6     | 11.4     |
| 7.78         | 169          | 73.8       | 12.8       | 16.9       | 140.7      | 150        | 181        | 13.7     | 10.1     |
| 7.02         | 87           | 72.8       | 13.2       | 15         | 139.1      | 152        | 73         | 13.5     | 10.8     |
| 8.7          | 147          | 72.4       | 14.5       | 14.9       | 138.5      | 150.5      | 137        | 18.2     | 11.8     |
| 7.96         | 162          | 72.9       | 12.3       | 13.6       | 139.1      | 147.2      | 195        | 14.3     | 10.6     |
| 8.2          | 0            | 74.6       | 11.7       | 12.5       | 141.9      | 146.1      | 0          | ----     | 11.7     |
| 8.13         | 0            | 69.1       | 13.9       | 11.9       | 133.7      | 143        | 0          | ----     | ----     |
| 6.99         | 0            | 70.7       | 13.9       | 11.2       | 135.9      | 144.5      | 0          | ----     | ----     |
| 7.39         | 0            | 75.5       | 15.3       | 12.4       | 143.2      | 146.6      | 0          | ----     | ----     |
| 7.04         | 0            | 71.7       | 14         | 10.8       | 137.6      | 145.5      | 0          | ----     | 14       |
| 7.9          | 5            | 72.2       | 16         | 14         | 138.3      | 144.8      | 5          | ----     | 16       |
| 7.01         | 0            | 72.9       | 13.7       | 11.5       | 139.1      | 147.6      | 0          | ----     | 13.7     |
| 8.23         | 0            | 70.6       | 12.8       | 12         | 135.8      | 149.2      | 0          | ----     | 12.8     |
| 8.66         | 2            | 69.7       | 14.6       | 12.9       | 134.6      | 147.2      | 2          | ----     | 14.6     |
| 7.24         | 0            | 68.6       | 16.4       | 8.4        | 132.9      | 145.1      | 0          | ----     | 16.4     |
| 5.42         | 32           | 69.6       | 17         | 9.5        | 134.3      | 145.6      | 32         | ----     | 17       |
| 6.25         | 0            | 74.6       | 20         | 10.6       | 141.7      | 149        | 0          | ----     | ----     |
| 6.4          | 10           | 70.6       | 15.4       | 9.7        | 136        | 149.7      | 4          | ----     | ----     |
| 7.16         | 37           | 72.2       | 13.9       | 15.6       | 138.2      | 148.3      | 25         | ----     | ----     |
| 6.73         | 6            | 72.5       | 15.2       | 13.6       | 138.8      | 148.9      | 3          | ----     | ----     |
| 7.85         | 0            | 71.3       | 13.9       | 11.8       | 136.9      | 146.5      | 0          | ----     | ----     |
| 10.9         | 9            | 71.5       | 15         | 11.5       | 137.3      | 145.2      | 9          | ----     | 15       |
| 7.86         | 195          | 70.4       | 15.2       | 13.7       | 135.6      | 142.4      | 189        | ----     | ----     |
| 6.86         | 377          | 70.4       | 15         | 13.1       | 135.6      | 141.5      | 403        | 22.1     | 13.5     |
| 7.08         | 105          | 75.1       | 15.8       | 13.5       | 142.8      | 145        | 106        | 20.3     | 13.7     |
| 6.93         | 131          | 70.7       | 14.5       | 11.2       | 135.8      | 146.2      | 117        | ----     | ----     |
| 7.65         | 98           | 71.5       | 13.9       | 15.9       | 137.2      | 148.2      | 99         | 16.8     | 11.1     |
| 6.79         | 251          | 72.6       | 13.4       | 14         | 138.8      | 148.1      | 242        | 15.6     | 12       |
| 7.52         | 172          | 70.9       | 14.8       | 13.4       | 136.6      | 144.9      | 177        | ----     | ----     |
| 9.14         | 237          | 69.1       | 12.4       | 11.6       | 133.9      | 135.5      | 226        | 18.2     | 12       |
| 8.15         | 258          | 70.6       | 14.2       | 12.6       | 135.8      | 142.4      | 272        | 19.5     | 12.9     |
| 6.86         | 355          | 71.4       | 15.6       | 13         | 137.2      | 142.1      | 375        | ----     | ----     |
| 7.64         | 284          | 76.7       | 13.8       | 13.8       | 145        | 145.2      | 301        | 18.6     | 12.2     |
| 7.2          | 266          | 73.2       | 13.7       | 12.3       | 139.8      | 144.9      | 278        | 18.1     | 11.9     |
| 7.9          | 241          | 73.3       | 13.6       | 15.3       | 139.7      | 148.8      | 288        | 17.4     | 11.9     |
| 6.87         | 311          | 73.4       | 13.5       | 13.4       | 139.8      | 149.4      | 336        | 16.4     | 11.2     |
| 8.36         | 284          | 70.1       | 14.4       | 13.2       | 135.1      | 146.5      | 281        | 22.4     | 12.8     |
| 11.01        | 460          | 72.2       | 11.6       | 13.7       | 138.1      | 145.9      | 405        | 13       | 10.2     |

| P-LCR (%) | PCT (%) | PLT-I (K/uL) | MPV-I (fL) | WBC (K/uL) | NEUT# (K/uL) | LYMPH# (K/uL) | MONO# (K/uL) | EO# (K/uL) | BASO# (K/uL) |
|-----------|---------|--------------|------------|------------|--------------|---------------|--------------|------------|--------------|
| 37.2      | 0.42    | 373          | 11.3       | 18.81      | 11.72        | 5.55          | 1.25         | 0.27       | 0.02         |
| 41.2      | 0.47    | 398          | 11.9       | 13.34      | 7.98         | 3.56          | 1.01         | 0.72       | 0.07         |
| 40.3      | 0.33    | 274          | 12         | 22.83      | 14.64        | 6.74          | 1.15         | 0.26       | 0.04         |
| 41        | 0.13    | 106          | 11.9       | 11.86      | 6.77         | 4.24          | 0.64         | 0.2        | 0.01         |
| 34.5      | 0.34    | 309          | 11         | 11.85      | 7.39         | 3.44          | 0.7          | 0.27       | 0.05         |
| 34.1      | 0.31    | 283          | 11         | 6.39       | 2.63         | 2.17          | 1.22         | 0.31       | 0.06         |
| 36.4      | 0.37    | 328          | 11.2       | 10         | 5.1          | 3.7           | 0.84         | 0.26       | 0.1          |
| 36.8      | 0.38    | 343          | 11.2       | 10.14      | 5.96         | 3.26          | 0.78         | 0.13       | 0.01         |
| 36.9      | 0.41    | 363          | 11.2       | 15.06      | 8.43         | 4.46          | 1.53         | 0.64       | 0            |
| 40.7      | 0.4     | 343          | 11.8       | 14.69      | 7.55         | 5.31          | 1.32         | 0.5        | 0.01         |
| ----      | ----    | 17           | ----       | 1.83       | 0.99         | 0.45          | 0.27         | 0.12       | 0            |
| ----      | ----    | 148          | ----       | 4.27       | 3.28         | 0.65          | 0.23         | 0.11       | 0            |
| 41.7      | 0.2     | 168          | 12         | 2.7        | 1.2          | 1.01          | 0.29         | 0.2        | 0            |
| 40.1      | 0.11    | 97           | 11.7       | 4.01       | 2.45         | 0.96          | 0.24         | 0.36       | 0            |
| 52.3      | 0.09    | 69           | 13.2       | 2.89       | 0.72         | 1.41          | 0.61         | 0.15       | 0            |
| 39.1      | 0.17    | 149          | 11.4       | 2.47       | 1.53         | 0.65          | 0.16         | 0.12       | 0.01         |
| 27.9      | 0.18    | 181          | 10.1       | 3.87       | 2            | 1.23          | 0.43         | 0.21       | 0            |
| 33.4      | 0.08    | 73           | 10.8       | 2.81       | 1.52         | 0.69          | 0.35         | 0.24       | 0.01         |
| 44.1      | 0.16    | 137          | 11.8       | 2.66       | 1.64         | 0.68          | 0.18         | 0.16       | 0            |
| 32.3      | 0.21    | 195          | 10.6       | 3.77       | 1.95         | 1.07          | 0.29         | 0.46       | 0            |
| ----      | 0       | 1            | ----       | 0.8        | 0.12         | 0.55          | 0.12         | 0.01       | 0            |
| ----      | ----    | 0            | ----       | 1.1        | 0.39         | 0.57          | 0.13         | 0.01       | 0            |
| ----      | ----    | 0            | ----       | 1.24       | 0.25         | 0.77          | 0.21         | 0.01       | 0            |
| ----      | ----    | 0            | ----       | 1.27       | 0.17         | 0.93          | 0.16         | 0          | 0.01         |
| ----      | 0       | 0            | ----       | 1.83       | 1.03         | 0.66          | 0.14         | 0          | 0            |
| ----      | 0.01    | 7            | ----       | 2.46       | 0.84         | 1.39          | 0.2          | 0.02       | 0.01         |
| ----      | 0       | 0            | ----       | 1.45       | 0.57         | 0.67          | 0.19         | 0.01       | 0.01         |
| ----      | 0       | 0            | ----       | 0.93       | 0.2          | 0.61          | 0.12         | 0          | 0            |
| ----      | 0       | 8            | ----       | 2.83       | 1.45         | 1.2           | 0.16         | 0.02       | 0            |
| ----      | 0       | 0            | ----       | 1.52       | 0.43         | 0.8           | 0.29         | 0          | 0            |
| ----      | 0.05    | 20           | ----       | 3.24       | 1.47         | 1.24          | 0.53         | 0          | 0            |
| ----      | ----    | 0            | ----       | 1.28       | 0.37         | 0.7           | 0.21         | 0          | 0            |
| ----      | ----    | 4            | ----       | 1.09       | 0.31         | 0.59          | 0.19         | 0          | 0            |
| ----      | ----    | 25           | ----       | 4.21       | 1.81         | 1.87          | 0.51         | 0.02       | 0            |
| ----      | ----    | 3            | ----       | 1.84       | 0.62         | 0.98          | 0.23         | 0.01       | 0            |
| ----      | ----    | 0            | ----       | 1.11       | 0.37         | 0.59          | 0.15         | 0          | 0            |
| ----      | 0.01    | 7            | ----       | 2.01       | 0.91         | 0.94          | 0.16         | 0          | 0            |
| ----      | ----    | 189          | ----       | 7.26       | 4.91         | 1.5           | 0.83         | 0.02       | 0            |
| 53.2      | 0.54    | 403          | 13.5       | 15.18      | 9.75         | 2.34          | 2.87         | 0.2        | 0.02         |
| 54.9      | 0.14    | 106          | 13.7       | 11.31      | 7.54         | 2.07          | 1.62         | 0.08       | 0            |
| ----      | ----    | 117          | ----       | 9.11       | 6.16         | 1.67          | 1.22         | 0.03       | 0.03         |
| 37.8      | 0.11    | 99           | 11.1       | 13.3       | 8.31         | 3.36          | 1.56         | 0.06       | 0.01         |
| 40.3      | 0.29    | 242          | 12         | 11.5       | 8.54         | 1.64          | 1.25         | 0.05       | 0.02         |
| ----      | ----    | 177          | ----       | 5.72       | 4.03         | 1.12          | 0.54         | 0.03       | 0            |
| 42        | 0.27    | 226          | 12         | 5.41       | 3.27         | 1.57          | 0.46         | 0.1        | 0.01         |
| 52.3      | 0.35    | 272          | 12.9       | 10.06      | 6.9          | 1.86          | 1.09         | 0.17       | 0.04         |
| ----      | ----    | 375          | ----       | 15.9       | 10.72        | 2.48          | 2.21         | 0.48       | 0.01         |
| 45.8      | 0.37    | 301          | 12.2       | 15.14      | 9.57         | 3.36          | 1.74         | 0.46       | 0.01         |
| 42.5      | 0.33    | 278          | 11.9       | 10.25      | 7.08         | 2.05          | 1.02         | 0.08       | 0.02         |
| 41.6      | 0.34    | 288          | 11.9       | 13.55      | 8.91         | 2.88          | 1.4          | 0.34       | 0.02         |
| 37.9      | 0.38    | 336          | 11.2       | 14.94      | 10.58        | 2.3           | 1.7          | 0.26       | 0.1          |
| 49.5      | 0.36    | 281          | 12.8       | 9.59       | 7.11         | 1.53          | 0.83         | 0.11       | 0.01         |
| 28.4      | 0.41    | 405          | 10.2       | 11.97      | 8.84         | 2.17          | 0.65         | 0.3        | 0.01         |

| NEUT% (%) | LYMPH% (%) | MONO% (%) | EO% (%) | BASO% (%) | DIFF-X (cl) | DIFF-Y (cl) | FSC-X (ch) | RET-He (pg) | RBC-He (pg) |
|-----------|------------|-----------|---------|-----------|-------------|-------------|------------|-------------|-------------|
| 62.4      | 29.5       | 6.6       | 1.4     | 0.1       | 87.6        | 46.2        | 10.3       | 22.5        | 22.6        |
| 59.8      | 26.7       | 7.6       | 5.4     | 0.5       | 89          | 47.3        | 10.8       | 23.5        | 24.2        |
| 64.2      | 29.5       | 5         | 1.1     | 0.2       | 87          | 46.5        | 10.5       | 23.3        | 23.5        |
| 57        | 35.8       | 5.4       | 1.7     | 0.1       | 85.8        | 45.1        | 10.8       | 22.7        | 23.1        |
| 62.4      | 29         | 5.9       | 2.3     | 0.4       | 88.5        | 47          | 10.4       | 23.2        | 23          |
| 41.1      | 34         | 19.1      | 4.9     | 0.9       | 85.5        | 46.9        | 10.6       | 24.1        | 23.7        |
| 51        | 37         | 8.4       | 2.6     | 1         | 84.7        | 46.5        | 10.2       | 22          | 21.8        |
| 58.8      | 32.1       | 7.7       | 1.3     | 0.1       | 88.9        | 46.6        | 10.7       | 23.5        | 23.4        |
| 56        | 29.6       | 10.2      | 4.2     | 0         | 89.8        | 48.5        | 10.5       | 21.9        | 22.8        |
| 51.4      | 36.1       | 9         | 3.4     | 0.1       | 82.2        | 47.5        | 10.2       | 24.3        | 24.5        |
| 54        | 24.6       | 14.8      | 6.6     | 0         | 88.3        | 57.2        | 11.8       | 22.9        | 23.9        |
| 76.8      | 15.2       | 5.4       | 2.6     | 0         | 86.9        | 52.9        | 10.7       | 21          | 22.3        |
| 44.5      | 37.4       | 10.7      | 7.4     | 0         | 92.4        | 58.2        | 12.1       | 24.2        | 22.8        |
| 61.1      | 23.9       | 6         | 9       | 0         | 84.8        | 52.3        | 11.3       | 20.9        | 24.6        |
| 24.9      | 48.8       | 21.1      | 5.2     | 0         | 102.4       | 94          | 11.6       | 23.9        | 24.2        |
| 61.9      | 26.3       | 6.5       | 4.9     | 0.4       | 89.2        | 49.2        | 12.1       | 23.7        | 23.3        |
| 51.7      | 31.8       | 11.1      | 5.4     | 0         | 91.8        | 53.6        | 11.2       | 23.2        | 23.2        |
| 54        | 24.6       | 12.5      | 8.5     | 0.4       | 89.6        | 52.7        | 12.3       | 19.2        | 22.8        |
| 61.6      | 25.6       | 6.8       | 6       | 0         | 86.3        | 51.1        | 11.4       | 20.3        | 22.7        |
| 51.7      | 28.4       | 7.7       | 12.2    | 0         | 88.1        | 49.4        | 12.2       | 22.7        | 22.8        |
| 14.9      | 68.8       | 15        | 1.3     | 0         | 90.3        | 68.9        | 11         | 23.1        | 23.5        |
| 35.5      | 51.8       | 11.8      | 0.9     | 0         | 89.9        | 59.2        | 10.5       | 22.6        | 21.7        |
| 20.2      | 62.1       | 16.9      | 0.8     | 0         | 96.8        | 54          | 11.1       | 19.6        | 22.1        |
| 13.4      | 73.2       | 12.6      | 0       | 0.8       | 88.6        | 58.5        | 11         | 21.9        | 23.8        |
| 56.2      | 36.1       | 7.7       | 0       | 0         | 94.2        | 51.3        | 10.9       | 21.7        | 22.5        |
| 34.2      | 56.5       | 8.1       | 0.8     | 0.4       | 94.1        | 54.8        | 10.5       | 21.7        | 22.7        |
| 39.3      | 46.2       | 13.1      | 0.7     | 0.7       | 93.5        | 58.7        | 10.9       | 23.1        | 22.8        |
| 21.5      | 65.6       | 12.9      | 0       | 0         | 95.5        | 63          | 11         | 22          | 22.1        |
| 51.2      | 42.4       | 5.7       | 0.7     | 0         | 90.3        | 47          | 10.3       | 22.7        | 21.9        |
| 28.3      | 52.6       | 19.1      | 0       | 0         | 95.5        | 76.7        | 10.6       | 22.6        | 21.5        |
| 45.3      | 38.3       | 16.4      | 0       | 0         | 95.4        | 59.6        | 11.3       | 21.1        | 21.8        |
| 28.9      | 54.7       | 16.4      | 0       | 0         | 95.8        | 84.6        | 10.9       | 25.2        | 23.4        |
| 28.5      | 54.1       | 17.4      | 0       | 0         | 101.7       | 88.1        | 10.7       | 22.5        | 22.2        |
| 43        | 44.4       | 12.1      | 0.5     | 0         | 92.4        | 57.7        | 9.9        | 21.7        | 22.6        |
| 33.7      | 53.3       | 12.5      | 0.5     | 0         | 93.2        | 64.1        | 10.9       | 22.3        | 22.8        |
| 33.3      | 53.2       | 13.5      | 0       | 0         | 97          | 82          | 11         | 21.2        | 22.4        |
| 45.2      | 46.8       | 8         | 0       | 0         | 92.9        | 56.4        | 10.2       | 21.3        | 22.4        |
| 67.6      | 20.7       | 11.4      | 0.3     | 0         | 84.2        | 53.4        | 11.3       | 20.8        | 22.1        |
| 64.3      | 15.4       | 18.9      | 1.3     | 0.1       | 87.6        | 51.8        | 12.5       | 20.1        | 22.1        |
| 66.7      | 18.3       | 14.3      | 0.7     | 0         | 81.6        | 54          | 11         | 21.5        | 23.7        |
| 67.7      | 18.3       | 13.4      | 0.3     | 0.3       | 86.5        | 49.5        | 12.8       | 22.3        | 22.1        |
| 62.4      | 25.3       | 11.7      | 0.5     | 0.1       | 87.3        | 51.3        | 12.4       | 22.5        | 22.4        |
| 74.2      | 14.3       | 10.9      | 0.4     | 0.2       | 85.7        | 51.5        | 11.9       | 23.4        | 22.8        |
| 70.5      | 19.6       | 9.4       | 0.5     | 0         | 86.2        | 55.8        | 11.7       | 20.1        | 22.3        |
| 60.5      | 29         | 8.5       | 1.8     | 0.2       | 86.8        | 50.3        | 10.4       | 20.3        | 21.7        |
| 68.6      | 18.5       | 10.8      | 1.7     | 0.4       | 84.7        | 46.8        | 9.9        | 22          | 22.1        |
| 67.4      | 15.6       | 13.9      | 3       | 0.1       | 89.1        | 47.2        | 11.5       | 20.9        | 22.4        |
| 63.2      | 22.2       | 11.5      | 3       | 0.1       | 82.2        | 48.2        | 10.2       | 23.6        | 24.2        |
| 69        | 20         | 10        | 0.8     | 0.2       | 88.1        | 45.8        | 11.1       | 23.1        | 23          |
| 65.8      | 21.3       | 10.3      | 2.5     | 0.1       | 88          | 46.6        | 10.7       | 23.8        | 23          |
| 70.8      | 15.4       | 11.4      | 1.7     | 0.7       | 86.5        | 47.7        | 11.3       | 24.9        | 23          |
| 74.1      | 16         | 8.7       | 1.1     | 0.1       | 85.5        | 48.6        | 10.3       | 23          | 22          |
| 73.9      | 18.1       | 5.4       | 2.5     | 0.1       | 86.6        | 47.9        | 10.5       | 23          | 22.6        |

| RET-Y(ch) | RBC Tota | RBC Rate | PLT Tota | PLT Rate | R-MFV | PDW-CV | S-RBC | S-MCV | S-RDW |
|-----------|----------|----------|----------|----------|-------|--------|-------|-------|-------|
| 137.7     | 9230     | 13       | 8719     | 7        | 642   | 10000  | 0     | 0     | 0     |
| 142.1     | 9384     | 14       | 8779     | 4        | 732   | 10000  | 0     | 0     | 0     |
| 141.3     | 9891     | 13       | 9752     | 5        | 684   | 10000  | 0     | 0     | 0     |
| 138.4     | 9673     | 14       | 8913     | 6        | 672   | 10000  | 0     | 0     | 0     |
| 140.9     | 9829     | 14       | 9159     | 5        | 703   | 10000  | 0     | 0     | 0     |
| 144.5     | 9294     | 14       | 9958     | 5        | 685   | 10000  | 0     | 0     | 0     |
| 135.3     | 9318     | 15       | 9338     | 8        | 624   | 10000  | 0     | 0     | 0     |
| 141.8     | 9698     | 13       | 8542     | 6        | 675   | 10000  | 0     | 0     | 0     |
| 134.6     | 9377     | 14       | 9678     | 6        | 660   | 10000  | 0     | 0     | 0     |
| 145.5     | 9914     | 13       | 8812     | 5        | 701   | 10000  | 0     | 0     | 0     |
| 139.3     | 9295     | 14       | 9342     | 5        | 690   | 0      | 0     | 0     | 0     |
| 130.6     | 9585     | 14       | 9279     | 7        | 648   | 0      | 0     | 0     | 0     |
| 144.9     | 9685     | 12       | 9911     | 5        | 670   | 10000  | 0     | 0     | 0     |
| 130       | 9834     | 12       | 9596     | 4        | 704   | 10000  | 0     | 0     | 0     |
| 143.6     | 9936     | 11       | 8455     | 4        | 707   | 10000  | 0     | 0     | 0     |
| 142.7     | 9635     | 13       | 9841     | 5        | 680   | 10000  | 0     | 0     | 0     |
| 140.9     | 9389     | 13       | 9358     | 6        | 658   | 10000  | 0     | 0     | 0     |
| 121.3     | 9209     | 12       | 9186     | 5        | 670   | 10000  | 0     | 0     | 0     |
| 127       | 9431     | 14       | 8690     | 7        | 656   | 10000  | 0     | 0     | 0     |
| 138.6     | 9360     | 14       | 8649     | 7        | 658   | 10000  | 0     | 0     | 0     |
| 140.4     | 9606     | 13       | 9871     | 5        | 671   | 0      | 0     | 0     | 0     |
| 137.8     | 9398     | 13       | 8885     | 7        | 629   | 0      | 0     | 0     | 0     |
| 123.7     | 9904     | 11       | 8751     | 6        | 639   | 0      | 0     | 0     | 0     |
| 135       | 9553     | 12       | 9634     | 4        | 691   | 0      | 0     | 0     | 0     |
| 133.9     | 9891     | 11       | 9333     | 5        | 657   | 0      | 0     | 0     | 0     |
| 133.8     | 9260     | 13       | 8431     | 6        | 659   | 0      | 0     | 0     | 0     |
| 140.2     | 9640     | 11       | 8963     | 5        | 660   | 0      | 0     | 0     | 0     |
| 135.3     | 9572     | 13       | 8651     | 7        | 639   | 0      | 0     | 0     | 0     |
| 138.4     | 9432     | 14       | 9718     | 6        | 651   | 0      | 0     | 0     | 0     |
| 138.2     | 9271     | 12       | 8659     | 7        | 620   | 0      | 0     | 0     | 0     |
| 131       | 9651     | 9        | 9258     | 5        | 629   | 0      | 0     | 0     | 0     |
| 149       | 9861     | 10       | 9129     | 4        | 684   | 0      | 0     | 0     | 0     |
| 137.4     | 9809     | 10       | 9489     | 5        | 641   | 0      | 0     | 0     | 0     |
| 134       | 9436     | 12       | 8745     | 6        | 646   | 0      | 0     | 0     | 0     |
| 136.6     | 9207     | 11       | 8775     | 5        | 656   | 0      | 0     | 0     | 0     |
| 131.7     | 9612     | 13       | 9965     | 6        | 647   | 0      | 0     | 0     | 0     |
| 131.8     | 9556     | 13       | 9517     | 6        | 644   | 0      | 0     | 0     | 0     |
| 129.5     | 9323     | 13       | 8630     | 6        | 658   | 0      | 0     | 0     | 0     |
| 126.3     | 9098     | 12       | 9934     | 4        | 694   | 10000  | 0     | 0     | 0     |
| 132.9     | 9197     | 12       | 7964     | 4        | 715   | 10000  | 0     | 0     | 0     |
| 136.7     | 9751     | 11       | 8210     | 5        | 673   | 0      | 0     | 0     | 0     |
| 137.5     | 9302     | 13       | 8721     | 5        | 687   | 10000  | 0     | 0     | 0     |
| 141.7     | 9420     | 11       | 9441     | 4        | 686   | 10000  | 0     | 0     | 0     |
| 126       | 9247     | 13       | 9958     | 6        | 635   | 0      | 0     | 0     | 0     |
| 127.2     | 9323     | 14       | 9360     | 5        | 692   | 10000  | 0     | 0     | 0     |
| 135.1     | 9418     | 13       | 9820     | 5        | 673   | 10000  | 0     | 0     | 0     |
| 130.2     | 9768     | 11       | 8043     | 5        | 688   | 0      | 0     | 0     | 0     |
| 142.3     | 9814     | 12       | 8165     | 4        | 727   | 10000  | 0     | 0     | 0     |
| 140.3     | 9448     | 12       | 8081     | 5        | 691   | 10000  | 0     | 0     | 0     |
| 143.3     | 9419     | 13       | 9974     | 5        | 671   | 10000  | 0     | 0     | 0     |
| 147.8     | 9768     | 11       | 8406     | 5        | 684   | 10000  | 0     | 0     | 0     |
| 139.7     | 9631     | 13       | 9855     | 6        | 649   | 10000  | 0     | 0     | 0     |
| 139.9     | 9426     | 14       | 9497     | 6        | 668   | 10000  | 0     | 0     | 0     |

| P-MFV | PCT | L-RBC | L-MCV | L-RDW | PLT-I | RBC-LD | RBC-MD | RBC-UD | PLT-LD |
|-------|-----|-------|-------|-------|-------|--------|--------|--------|--------|
| 99    | 42  | 0     | 0     | 0     | 373   | 0      |        | 49     | 0      |
| 105   | 47  | 0     | 0     | 0     | 398   | 0      |        | 49     | 0      |
| 99    | 33  | 0     | 0     | 0     | 274   | 0      |        | 49     | 1      |
| 101   | 13  | 0     | 0     | 0     | 106   | 0      |        | 49     | 1      |
| 94    | 34  | 0     | 0     | 0     | 309   | 0      |        | 49     | 0      |
| 94    | 31  | 0     | 0     | 0     | 283   | 0      |        | 49     | 0      |
| 99    | 37  | 0     | 0     | 0     | 328   | 0      |        | 49     | 0      |
| 95    | 38  | 0     | 0     | 0     | 343   | 0      |        | 49     | 0      |
| 96    | 41  | 0     | 0     | 0     | 363   | 0      |        | 49     | 0      |
| 103   | 40  | 0     | 0     | 0     | 343   | 0      |        | 49     | 0      |
| 84    | 0   | 0     | 0     | 0     | 17    | 0      |        | 49     | 2      |
| 115   | 0   | 0     | 0     | 0     | 148   | 0      |        | 49     | 1      |
| 93    | 20  | 0     | 0     | 0     | 168   | 0      |        | 49     | 0      |
| 99    | 11  | 0     | 0     | 0     | 97    | 0      |        | 49     | 1      |
| 111   | 9   | 0     | 0     | 0     | 69    | 0      |        | 49     | 2      |
| 92    | 17  | 0     | 0     | 0     | 149   | 0      |        | 49     | 1      |
| 83    | 18  | 0     | 0     | 0     | 181   | 0      |        | 49     | 0      |
| 86    | 8   | 0     | 0     | 0     | 73    | 0      |        | 49     | 0      |
| 101   | 16  | 0     | 0     | 0     | 137   | 0      |        | 49     | 1      |
| 87    | 21  | 0     | 0     | 0     | 195   | 0      |        | 49     | 1      |
| 145   | 0   | 0     | 0     | 0     | 1     | 0      |        | 49     | 0      |
| 0     | 0   | 0     | 0     | 0     | 0     | 0      |        | 49     | 0      |
| 284   | 0   | 0     | 0     | 0     | 0     | 0      |        | 49     | 0      |
| 85    | 0   | 0     | 0     | 0     | 0     | 0      |        | 49     | 5      |
| 60    | 0   | 0     | 0     | 0     | 0     | 0      |        | 49     | 4      |
| 75    | 1   | 0     | 0     | 0     | 7     | 0      |        | 49     | 4      |
| 291   | 0   | 0     | 0     | 0     | 0     | 0      |        | 49     | 0      |
| 80    | 0   | 0     | 0     | 0     | 0     | 0      |        | 49     | 0      |
| 130   | 0   | 0     | 0     | 0     | 8     | 0      |        | 49     | 0      |
| 65    | 0   | 0     | 0     | 0     | 0     | 0      |        | 49     | 4      |
| 133   | 5   | 0     | 0     | 0     | 20    | 0      |        | 49     | 1      |
| 55    | 0   | 0     | 0     | 0     | 0     | 0      |        | 49     | 3      |
| 108   | 0   | 0     | 0     | 0     | 4     | 0      |        | 49     | 2      |
| 89    | 0   | 0     | 0     | 0     | 25    | 0      |        | 49     | 2      |
| 69    | 0   | 0     | 0     | 0     | 3     | 0      |        | 49     | 2      |
| 289   | 0   | 0     | 0     | 0     | 0     | 0      |        | 49     | 0      |
| 91    | 1   | 0     | 0     | 0     | 7     | 0      |        | 49     | 3      |
| 124   | 0   | 0     | 0     | 0     | 189   | 0      |        | 49     | 2      |
| 113   | 54  | 0     | 0     | 0     | 403   | 0      |        | 49     | 0      |
| 108   | 14  | 0     | 0     | 0     | 106   | 0      |        | 49     | 1      |
| 94    | 0   | 0     | 0     | 0     | 117   | 0      |        | 49     | 0      |
| 92    | 11  | 0     | 0     | 0     | 99    | 0      |        | 49     | 0      |
| 89    | 29  | 0     | 0     | 0     | 242   | 0      |        | 49     | 0      |
| 111   | 0   | 0     | 0     | 0     | 177   | 0      |        | 49     | 0      |
| 91    | 27  | 0     | 0     | 0     | 226   | 0      |        | 49     | 0      |
| 119   | 35  | 0     | 0     | 0     | 272   | 0      |        | 49     | 1      |
| 115   | 0   | 0     | 0     | 0     | 375   | 0      |        | 49     | 0      |
| 107   | 37  | 0     | 0     | 0     | 301   | 0      |        | 49     | 0      |
| 95    | 33  | 0     | 0     | 0     | 278   | 0      |        | 49     | 0      |
| 96    | 34  | 0     | 0     | 0     | 288   | 0      |        | 49     | 0      |
| 95    | 38  | 0     | 0     | 0     | 336   | 0      |        | 49     | 0      |
| 109   | 36  | 0     | 0     | 0     | 281   | 0      |        | 49     | 1      |
| 85    | 41  | 0     | 0     | 0     | 405   | 0      |        | 49     | 0      |

| PLT-UD | HGB Samp | HGB Blan | RBC Clog | RBC Dist | PLT Dist | DIFF Tot | DIFF Rate | DIFF-X | DIFF-Y |
|--------|----------|----------|----------|----------|----------|----------|-----------|--------|--------|
| 28     | 4652     | 3123     | 98       |          |          | 9095     | 2         | 876    | 462    |
| 28     | 5006     | 3117     | 98       |          |          | 6582     | 2         | 890    | 473    |
| 27     | 4838     | 3111     | 98       |          |          | 7301     | 3         | 870    | 465    |
| 25     | 4918     | 3106     | 98       |          |          | 5539     | 2         | 858    | 451    |
| 26     | 4959     | 3099     | 98       |          |          | 5852     | 2         | 885    | 470    |
| 28     | 4879     | 3092     | 98       |          |          | 6337     | 1         | 855    | 469    |
| 24     | 4868     | 3082     | 98       |          |          | 5046     | 2         | 847    | 465    |
| 26     | 4737     | 3069     | 98       |          |          | 9950     | 1         | 889    | 466    |
| 26     | 4756     | 3059     | 98       |          |          | 7756     | 2         | 898    | 485    |
| 28     | 4836     | 3052     | 97       |          |          | 7269     | 2         | 822    | 475    |
| 28     | 4464     | 2679     | 97       |          | UD DW    | 2082     | 1         | 883    | 572    |
| 26     | 4346     | 2670     | 97       |          | DW       | 4202     | 1         | 869    | 529    |
| 28     | 4136     | 2660     | 97       |          |          | 3113     | 1         | 924    | 582    |
| 27     | 4249     | 2650     | 97       |          |          | 3893     | 1         | 848    | 523    |
| 27     | 4108     | 2642     | 97       |          |          | 2830     | 1         | 1024   | 940    |
| 25     | 4283     | 2632     | 96       |          |          | 2435     | 1         | 892    | 492    |
| 22     | 4188     | 2626     | 96       |          |          | 3907     | 1         | 918    | 536    |
| 26     | 4066     | 2621     | 96       |          |          | 2724     | 1         | 896    | 527    |
| 22     | 4356     | 2617     | 95       |          |          | 2825     | 1         | 863    | 511    |
| 25     | 4297     | 2616     | 95       |          |          | 3749     | 1         | 881    | 494    |
| 28     | 4683     | 2956     | 97       |          | UD DW    | 773      | 1         | 903    | 689    |
| 24     | 4486     | 2949     | 97       |          | DW       | 1075     | 1         | 899    | 592    |
| 27     | 4329     | 2941     | 97       |          | DW       | 1201     | 1         | 968    | 540    |
| 27     | 4507     | 2934     | 97       |          | DW       | 1189     | 1         | 886    | 585    |
| 28     | 4354     | 2927     | 97       |          | UD DW    | 1731     | 1         | 942    | 513    |
| 29     | 4521     | 2923     | 97       |          | UD DW    | 2376     | 1         | 941    | 548    |
| 28     | 4310     | 2916     | 96       |          | UD DW    | 1360     | 1         | 935    | 587    |
| 26     | 4550     | 2910     | 96       |          | UD DW    | 901      | 1         | 955    | 630    |
| 29     | 4653     | 2904     | 96       |          | UD DW    | 2917     | 1         | 903    | 470    |
| 25     | 3941     | 2581     | 96       |          | UD DW    | 1588     | 1         | 955    | 767    |
| 24     | 3628     | 2570     | 96       |          | UD DW    | 4616     | 1         | 954    | 596    |
| 26     | 3865     | 2562     | 96       |          | DW       | 1282     | 1         | 958    | 846    |
| 20     | 3810     | 2550     | 95       |          | DW       | 1245     | 1         | 1017   | 881    |
| 22     | 4009     | 2545     | 95       |          | DW       | 5105     | 1         | 924    | 577    |
| 27     | 3901     | 2542     | 94       |          | DW       | 1824     | 1         | 932    | 641    |
| 25     | 4154     | 2540     | 94       |          | DW       | 1114     | 1         | 970    | 820    |
| 25     | 4144     | 2539     | 94       |          | UD DW    | 2025     | 1         | 929    | 564    |
| 27     | 4104     | 2594     | 96       |          | DW       | 8974     | 1         | 842    | 534    |
| 28     | 3945     | 2581     | 96       |          |          | 9344     | 2         | 876    | 518    |
| 28     | 4057     | 2569     | 96       |          |          | 5862     | 2         | 816    | 540    |
| 26     | 3921     | 2559     | 96       |          | DW       | 9211     | 1         | 865    | 495    |
| 23     | 4133     | 2546     | 95       |          |          | 7214     | 2         | 873    | 513    |
| 29     | 3896     | 2536     | 95       |          |          | 5737     | 2         | 857    | 515    |
| 25     | 4055     | 2532     | 94       |          | DW       | 6899     | 1         | 862    | 558    |
| 26     | 4260     | 2528     | 94       |          |          | 5999     | 1         | 868    | 503    |
| 24     | 4444     | 2888     | 98       |          |          | 5610     | 2         | 847    | 468    |
| 28     | 4211     | 2875     | 98       |          | DW       | 6938     | 3         | 891    | 472    |
| 25     | 4461     | 2861     | 97       |          |          | 7755     | 2         | 822    | 482    |
| 27     | 4296     | 2847     | 97       |          |          | 5280     | 2         | 881    | 458    |
| 27     | 4430     | 2833     | 97       |          |          | 7056     | 2         | 880    | 466    |
| 25     | 4216     | 2819     | 97       |          |          | 7364     | 2         | 865    | 477    |
| 26     | 4404     | 2804     | 96       |          |          | 5343     | 2         | 855    | 486    |
| 26     | 4582     | 2786     | 96       |          |          | 6166     | 2         | 866    | 479    |



| DIFF-WX | DIFF-WY | NEUT-X | NEUT-Y | LYMPH-X | LYMPH-Y | MONO-X | MONO-Y | NEUT-WX | NEUT-WY |
|---------|---------|--------|--------|---------|---------|--------|--------|---------|---------|
| 508     | 1729    | 876    | 462    | 829     | 882     | 1068   | 1553   | 343     | 585     |
| 488     | 629     | 890    | 473    | 855     | 983     | 1069   | 1595   | 326     | 613     |
| 474     | 623     | 870    | 465    | 847     | 954     | 1064   | 1509   | 333     | 603     |
| 467     | 596     | 858    | 451    | 854     | 992     | 1045   | 1592   | 338     | 576     |
| 469     | 573     | 885    | 470    | 845     | 962     | 1059   | 1547   | 328     | 554     |
| 580     | 657     | 855    | 469    | 874     | 1024    | 1063   | 1733   | 351     | 555     |
| 531     | 578     | 847    | 465    | 848     | 1020    | 1063   | 1659   | 366     | 559     |
| 490     | 535     | 889    | 466    | 849     | 968     | 1062   | 1686   | 326     | 493     |
| 473     | 593     | 898    | 485    | 853     | 971     | 1055   | 1566   | 334     | 577     |
| 566     | 626     | 822    | 475    | 847     | 1001    | 1056   | 1518   | 365     | 632     |
| 914     | 2336    | 883    | 572    | 886     | 1094    | 1057   | 1570   | 340     | 682     |
| 379     | 604     | 869    | 529    | 881     | 1095    | 1041   | 1534   | 322     | 605     |
| 450     | 1492    | 924    | 582    | 867     | 1037    | 1030   | 1502   | 325     | 601     |
| 375     | 569     | 848    | 523    | 867     | 1071    | 1101   | 1533   | 342     | 573     |
| 883     | 1087    | 1024   | 940    | 851     | 1075    | 1108   | 1245   | 381     | 564     |
| 417     | 545     | 892    | 492    | 863     | 977     | 1053   | 1476   | 325     | 528     |
| 539     | 560     | 918    | 536    | 867     | 1029    | 1059   | 1570   | 327     | 560     |
| 513     | 584     | 896    | 527    | 889     | 1125    | 1064   | 1563   | 313     | 607     |
| 415     | 486     | 863    | 511    | 877     | 1110    | 1041   | 1548   | 325     | 470     |
| 469     | 556     | 881    | 494    | 856     | 1001    | 1024   | 1514   | 318     | 486     |
| 468     | 1165    | 903    | 689    | 917     | 1082    | 1018   | 1383   | 277     | 580     |
| 398     | 1282    | 899    | 592    | 902     | 1067    | 995    | 1425   | 334     | 794     |
| 606     | 956     | 968    | 540    | 899     | 991     | 1133   | 1407   | 362     | 944     |
| 400     | 970     | 886    | 585    | 898     | 1041    | 1032   | 1455   | 327     | 666     |
| 345     | 584     | 942    | 513    | 903     | 997     | 1013   | 1312   | 276     | 584     |
| 396     | 1937    | 941    | 548    | 891     | 999     | 1046   | 1327   | 340     | 693     |
| 463     | 1964    | 935    | 587    | 914     | 1112    | 1005   | 1523   | 278     | 715     |
| 390     | 3890    | 955    | 630    | 915     | 1090    | 1082   | 1403   | 335     | 778     |
| 378     | 552     | 903    | 470    | 897     | 1005    | 1063   | 1508   | 310     | 553     |
| 621     | 2072    | 955    | 767    | 920     | 1076    | 1081   | 1475   | 377     | 717     |
| 489     | 2189    | 954    | 596    | 903     | 1068    | 1071   | 1549   | 325     | 637     |
| 566     | 917     | 958    | 846    | 896     | 1121    | 1049   | 1550   | 355     | 697     |
| 897     | 2653    | 1017   | 881    | 903     | 1049    | 1011   | 1582   | 384     | 624     |
| 823     | 10417   | 924    | 577    | 885     | 1015    | 1072   | 1726   | 346     | 641     |
| 457     | 1626    | 932    | 641    | 902     | 1152    | 1012   | 1588   | 290     | 562     |
| 512     | 8767    | 970    | 820    | 904     | 1059    | 1044   | 1475   | 320     | 731     |
| 440     | 1877    | 929    | 564    | 874     | 1015    | 992    | 1421   | 312     | 586     |
| 577     | 543     | 842    | 534    | 877     | 1117    | 1059   | 1575   | 344     | 505     |
| 533     | 540     | 876    | 518    | 907     | 1037    | 1058   | 1733   | 342     | 541     |
| 607     | 537     | 816    | 540    | 873     | 1124    | 1060   | 1715   | 356     | 463     |
| 528     | 484     | 865    | 495    | 897     | 1022    | 1069   | 1751   | 358     | 464     |
| 549     | 1637    | 873    | 513    | 873     | 932     | 1049   | 1734   | 355     | 604     |
| 522     | 524     | 857    | 515    | 897     | 1130    | 1054   | 1746   | 350     | 505     |
| 810     | 574     | 862    | 558    | 878     | 1090    | 1043   | 1876   | 348     | 502     |
| 544     | 476     | 868    | 503    | 847     | 1060    | 1028   | 1621   | 346     | 437     |
| 563     | 512     | 847    | 468    | 882     | 1022    | 1062   | 1705   | 342     | 513     |
| 471     | 1750    | 891    | 472    | 906     | 1035    | 1060   | 1644   | 326     | 593     |
| 591     | 600     | 822    | 482    | 880     | 1049    | 1058   | 1555   | 365     | 560     |
| 477     | 523     | 881    | 458    | 880     | 992     | 1067   | 1674   | 340     | 502     |
| 465     | 556     | 880    | 466    | 880     | 1008    | 1044   | 1657   | 329     | 537     |
| 495     | 502     | 865    | 477    | 903     | 1078    | 1070   | 1704   | 312     | 482     |
| 478     | 493     | 855    | 486    | 893     | 1053    | 1046   | 1706   | 316     | 493     |
| 439     | 500     | 866    | 479    | 865     | 1050    | 1040   | 1624   | 323     | 481     |

| LYMPH-WX | LYMPH-WY | MONO-WX | MONO-WY | WBC# (Dif) | WBC# (FSC) | Delta-WB | WBC-LD | FSC-X | FSCW-Inf |
|----------|----------|---------|---------|------------|------------|----------|--------|-------|----------|
| 471      | 816      | 290     | 728     | 18808      | 18016      | 1044     | 0      | 103   | 0        |
| 421      | 723      | 271     | 765     | 13343      | 13037      | 1023     | 0      | 108   | 1        |
| 449      | 755      | 282     | 630     | 22826      | 21694      | 1052     | 0      | 105   | 0        |
| 363      | 766      | 297     | 691     | 11859      | 10972      | 1081     | 0      | 108   | 2        |
| 438      | 748      | 255     | 718     | 11854      | 11581      | 1024     | 0      | 104   | 0        |
| 377      | 771      | 320     | 641     | 6387       | 6270       | 1019     | 0      | 106   | 0        |
| 401      | 696      | 320     | 778     | 9995       | 9986       | 1001     | 0      | 102   | 1        |
| 400      | 826      | 320     | 658     | 10135      | 9838       | 1030     | 0      | 107   | 1        |
| 410      | 782      | 265     | 658     | 15063      | 15339      | 982      | 0      | 105   | 0        |
| 402      | 709      | 256     | 791     | 14692      | 14366      | 1023     | 0      | 102   | 0        |
| 395      | 777      | 473     | 465     | 1832       | 2037       | 899      | 0      | 118   | 68       |
| 329      | 749      | 423     | 378     | 4271       | 4110       | 1039     | 0      | 107   | 0        |
| 392      | 762      | 417     | 686     | 2696       | 2459       | 1096     | 7      | 121   | 1        |
| 381      | 719      | 418     | 248     | 4011       | 3805       | 1054     | 0      | 113   | 3        |
| 482      | 670      | 415     | 554     | 2887       | 2766       | 1044     | 0      | 116   | 3        |
| 406      | 880      | 361     | 237     | 2472       | 2377       | 1040     | 0      | 121   | 0        |
| 392      | 719      | 331     | 834     | 3871       | 3815       | 1015     | 0      | 112   | 0        |
| 315      | 676      | 507     | 525     | 2814       | 2658       | 1059     | 0      | 123   | 2        |
| 342      | 676      | 413     | 174     | 2659       | 2757       | 965      | 0      | 114   | 2        |
| 421      | 779      | 449     | 238     | 3774       | 3658       | 1032     | 0      | 122   | 0        |
| 338      | 721      | 413     | 72      | 798        | 761        | 1048     | 0      | 110   | 0        |
| 299      | 721      | 402     | 84      | 1101       | 1059       | 1040     | 0      | 105   | 0        |
| 389      | 686      | 406     | 142     | 1243       | 1182       | 1051     | 0      | 111   | 0        |
| 312      | 663      | 397     | 110     | 1268       | 1170       | 1084     | 0      | 110   | 0        |
| 310      | 772      | 365     | 107     | 1834       | 1704       | 1077     | 0      | 109   | 0        |
| 303      | 751      | 306     | 384     | 2455       | 2337       | 1050     | 0      | 105   | 0        |
| 295      | 684      | 458     | 256     | 1447       | 1337       | 1082     | 0      | 109   | 0        |
| 284      | 670      | 360     | 150     | 928        | 886        | 1047     | 0      | 110   | 0        |
| 312      | 736      | 348     | 192     | 2834       | 2867       | 988      | 0      | 103   | 1        |
| 359      | 660      | 453     | 129     | 1521       | 1547       | 983      | 0      | 106   | 0        |
| 388      | 740      | 336     | 884     | 3242       | 3018       | 1074     | 7      | 113   | 3        |
| 324      | 544      | 438     | 194     | 1282       | 1248       | 1027     | 0      | 109   | 0        |
| 432      | 791      | 455     | 190     | 1091       | 1212       | 900      | 0      | 107   | 2        |
| 384      | 886      | 298     | 811     | 4214       | 4971       | 848      | 0      | 99    | 0        |
| 344      | 651      | 425     | 504     | 1837       | 1774       | 1035     | 0      | 109   | 0        |
| 343      | 718      | 278     | 102     | 1106       | 1084       | 1021     | 0      | 110   | 0        |
| 320      | 680      | 363     | 267     | 2009       | 1968       | 1021     | 0      | 102   | 0        |
| 376      | 761      | 293     | 762     | 7260       | 6735       | 1078     | 7      | 113   | 0        |
| 386      | 829      | 255     | 675     | 15179      | 14095      | 1077     | 7      | 125   | 1        |
| 401      | 774      | 274     | 700     | 11309      | 11423      | 990      | 0      | 110   | 1        |
| 424      | 822      | 318     | 600     | 9108       | 8299       | 1097     | 7      | 128   | 0        |
| 504      | 923      | 305     | 738     | 13303      | 12323      | 1079     | 7      | 124   | 1        |
| 390      | 726      | 323     | 779     | 11504      | 11165      | 1030     | 0      | 119   | 0        |
| 421      | 771      | 336     | 603     | 5720       | 5306       | 1078     | 7      | 117   | 0        |
| 413      | 839      | 282     | 796     | 5405       | 5837       | 926      | 0      | 104   | 0        |
| 374      | 782      | 264     | 739     | 10055      | 11032      | 911      | 0      | 99    | 0        |
| 397      | 811      | 236     | 736     | 15903      | 14919      | 1066     | 7      | 115   | 2        |
| 409      | 801      | 265     | 740     | 15140      | 15240      | 993      | 0      | 102   | 0        |
| 477      | 826      | 272     | 825     | 10254      | 10366      | 989      | 0      | 111   | 1        |
| 466      | 823      | 326     | 724     | 13550      | 13853      | 978      | 0      | 107   | 3        |
| 366      | 779      | 252     | 716     | 14937      | 14448      | 1034     | 0      | 113   | 1        |
| 381      | 845      | 268     | 627     | 9594       | 10482      | 915      | 0      | 103   | 0        |
| 393      | 771      | 279     | 727     | 11974      | 12089      | 990      | 0      | 105   | 0        |

| FSCW-Info | DIFF LD | RET Total | RET Rate | RBC-X | RBC-Y | RBC-Z | RET-X | RET-Y | RBC-WX |
|-----------|---------|-----------|----------|-------|-------|-------|-------|-------|--------|
| 2         | 5185    | 84703     | 1        | 127   | 1380  | 1438  | 639   | 1377  | 709    |
| 0         | 5185    | 92652     | 1        | 129   | 1449  | 1456  | 712   | 1421  | 700    |
| 1         | 5185    | 88837     | 1        | 145   | 1419  | 1439  | 691   | 1413  | 689    |
| 0         | 5185    | 94574     | 1        | 142   | 1402  | 1438  | 649   | 1384  | 705    |
| 0         | 5185    | 94774     | 1        | 124   | 1400  | 1436  | 668   | 1409  | 723    |
| 0         | 5185    | 90528     | 1        | 135   | 1427  | 1460  | 562   | 1445  | 665    |
| 0         | 5185    | 97054     | 1        | 132   | 1343  | 1428  | 577   | 1353  | 760    |
| 0         | 5124    | 88328     | 1        | 114   | 1414  | 1454  | 620   | 1418  | 793    |
| 0         | 5124    | 91648     | 1        | 125   | 1389  | 1449  | 643   | 1346  | 718    |
| 0         | 5124    | 90934     | 1        | 136   | 1463  | 1477  | 665   | 1455  | 659    |
| 179       | 4941    | 88123     | 1        | 136   | 1438  | 1462  | 375   | 1393  | 660    |
| 1         | 4941    | 90276     | 1        | 136   | 1365  | 1443  | 386   | 1306  | 661    |
| 0         | 4941    | 78541     | 1        | 130   | 1390  | 1451  | 451   | 1449  | 771    |
| 3         | 4941    | 80037     | 1        | 147   | 1468  | 1488  | 358   | 1300  | 610    |
| 0         | 4941    | 73936     | 1        | 139   | 1451  | 1480  | 517   | 1436  | 717    |
| 1         | 4941    | 86186     | 1        | 122   | 1410  | 1474  | 419   | 1427  | 822    |
| 0         | 4941    | 82747     | 1        | 169   | 1407  | 1500  | 455   | 1409  | 651    |
| 0         | 4941    | 75032     | 1        | 150   | 1391  | 1520  | 415   | 1213  | 667    |
| 2         | 4941    | 90189     | 1        | 149   | 1385  | 1505  | 382   | 1270  | 671    |
| 0         | 4941    | 84227     | 1        | 136   | 1391  | 1472  | 466   | 1386  | 659    |
| 0         | 5063    | 84507     | 1        | 125   | 1419  | 1461  | 649   | 1404  | 717    |
| 1         | 5063    | 83888     | 1        | 119   | 1337  | 1430  | 657   | 1378  | 759    |
| 0         | 5063    | 73906     | 1        | 112   | 1359  | 1445  | 600   | 1237  | 803    |
| 0         | 5063    | 77376     | 1        | 124   | 1432  | 1466  | 621   | 1350  | 725    |
| 2         | 5063    | 74383     | 1        | 108   | 1376  | 1455  | 642   | 1339  | 833    |
| 0         | 5063    | 81946     | 1        | 140   | 1383  | 1448  | 679   | 1338  | 715    |
| 0         | 5063    | 74026     | 1        | 115   | 1391  | 1476  | 599   | 1402  | 786    |
| 0         | 5063    | 84740     | 1        | 120   | 1358  | 1492  | 323   | 1353  | 752    |
| 0         | 5063    | 88352     | 1        | 129   | 1346  | 1472  | 666   | 1384  | 697    |
| 0         | 4880    | 75831     | 1        | 84    | 1329  | 1451  | 558   | 1382  | 948    |
| 0         | 4880    | 59489     | 1        | 95    | 1343  | 1456  | 510   | 1310  | 945    |
| 0         | 4880    | 66812     | 1        | 106   | 1417  | 1490  | 632   | 1490  | 851    |
| 0         | 4880    | 68306     | 1        | 97    | 1360  | 1497  | 701   | 1374  | 927    |
| 0         | 4880    | 75621     | 1        | 156   | 1382  | 1483  | 702   | 1340  | 706    |
| 2         | 4880    | 71266     | 1        | 136   | 1388  | 1489  | 680   | 1366  | 663    |
| 1         | 4880    | 81121     | 1        | 118   | 1369  | 1465  | 563   | 1317  | 761    |
| 0         | 4880    | 105931    | 1        | 115   | 1373  | 1452  | 639   | 1318  | 783    |
| 0         | 4880    | 83761     | 1        | 137   | 1356  | 1424  | 655   | 1295  | 800    |
| 1         | 4880    | 77459     | 1        | 131   | 1356  | 1415  | 653   | 1263  | 838    |
| 2         | 4880    | 75865     | 1        | 135   | 1428  | 1450  | 664   | 1329  | 817    |
| 0         | 4880    | 74836     | 1        | 112   | 1358  | 1462  | 679   | 1367  | 889    |
| 0         | 4880    | 80732     | 1        | 159   | 1372  | 1482  | 750   | 1375  | 690    |
| 0         | 4880    | 75113     | 1        | 140   | 1388  | 1481  | 695   | 1417  | 715    |
| 0         | 4880    | 80508     | 1        | 134   | 1366  | 1449  | 688   | 1260  | 748    |
| 0         | 4880    | 94783     | 1        | 116   | 1339  | 1355  | 619   | 1272  | 776    |
| 0         | 5002    | 87280     | 1        | 126   | 1358  | 1424  | 611   | 1351  | 793    |
| 0         | 5002    | 77425     | 1        | 130   | 1372  | 1421  | 656   | 1302  | 770    |
| 2         | 5002    | 83341     | 1        | 138   | 1450  | 1452  | 720   | 1423  | 796    |
| 0         | 5002    | 79171     | 1        | 123   | 1398  | 1449  | 674   | 1403  | 810    |
| 1         | 5002    | 84989     | 1        | 153   | 1397  | 1488  | 734   | 1433  | 719    |
| 0         | 5002    | 76822     | 1        | 134   | 1398  | 1494  | 704   | 1478  | 745    |
| 0         | 5002    | 89229     | 1        | 132   | 1351  | 1465  | 681   | 1397  | 755    |
| 1         | 4941    | 112147    | 1        | 137   | 1381  | 1459  | 738   | 1399  | 729    |

| RBC-WY | RBC-O | Delta-RB | PLT-O | Delta-PL | PLT Blank | THR | THR-H | UPP | W-Area |
|--------|-------|----------|-------|----------|-----------|-----|-------|-----|--------|
| 297    | 772   | 1078     | 322   | 863      | 0         | 39  | 15    | 0   | 153    |
| 297    | 866   | 1080     | 332   | 834      | 0         | 38  | 17    | 0   | 101    |
| 310    | 831   | 1069     | 250   | 912      | 0         | 40  | 21    | 0   | 160    |
| 293    | 925   | 1120     | 84    | 792      | 0         | 40  | 15    | 0   | 93     |
| 307    | 899   | 1064     | 278   | 900      | 0         | 38  | 20    | 0   | 129    |
| 287    | 852   | 1080     | 260   | 919      | 0         | 39  | 17    | 0   | 51     |
| 365    | 925   | 1071     | 297   | 905      | 0         | 42  | 5     | 0   | 79     |
| 311    | 821   | 1080     | 289   | 843      | 0         | 37  | 25    | 0   | 57     |
| 324    | 853   | 1068     | 337   | 928      | 0         | 39  | 24    | 0   | 143    |
| 301    | 846   | 1083     | 324   | 945      | 0         | 38  | 26    | 0   | 155    |
| 278    | 862   | 1102     | 22    | 1294     | 0         | 38  | 11    | 0   | 22     |
| 337    | 872   | 1067     | 134   | 905      | 0         | 41  | 8     | 0   | 31     |
| 317    | 731   | 1067     | 152   | 905      | 0         | 39  | 3     | 0   | 31     |
| 279    | 757   | 1088     | 95    | 979      | 0         | 39  | 5     | 0   | 36     |
| 283    | 690   | 1087     | 79    | 1145     | 0         | 39  | 4     | 0   | 15     |
| 305    | 822   | 1097     | 149   | 1000     | 0         | 38  | 7     | 0   | 6      |
| 299    | 778   | 1073     | 169   | 934      | 0         | 42  | 6     | 0   | 49     |
| 252    | 702   | 1093     | 87    | 1192     | 0         | 40  | 3     | 0   | 30     |
| 282    | 870   | 1089     | 147   | 1073     | 0         | 40  | 7     | 0   | 18     |
| 288    | 796   | 1006     | 162   | 831      | 0         | 40  | 5     | 0   | 29     |
| 289    | 820   | 1101     | 0     | 0        | 0         | 38  | 5     | 0   | 0      |
| 344    | 813   | 1120     | 0     | 0        | 0         | 40  | 5     | 0   | 8      |
| 331    | 699   | 1106     | 0     | 0        | 0         | 39  | 4     | 0   | 9      |
| 293    | 739   | 1100     | 0     | 0        | 0         | 38  | 3     | 0   | 13     |
| 320    | 704   | 1116     | 0     | 0        | 0         | 38  | 1     | 0   | 11     |
| 318    | 790   | 1110     | 5     | 714      | 0         | 41  | 12    | 0   | 8      |
| 280    | 701   | 1145     | 0     | 0        | 0         | 38  | 7     | 0   | 20     |
| 302    | 823   | 1109     | 0     | 0        | 0         | 39  | 9     | 0   | 15     |
| 297    | 866   | 1085     | 2     | 250      | 0         | 40  | 18    | 0   | 20     |
| 324    | 724   | 1121     | 0     | 0        | 0         | 38  | 1     | 0   | 7      |
| 313    | 542   | 1118     | 32    | 1600     | 0         | 37  | 12    | 0   | 25     |
| 282    | 625   | 1114     | 0     | 0        | 0         | 36  | 5     | 0   | 8      |
| 294    | 640   | 1147     | 10    | 2500     | 0         | 37  | 8     | 0   | 5      |
| 304    | 716   | 1083     | 37    | 1480     | 0         | 42  | 13    | 0   | 28     |
| 274    | 673   | 1166     | 6     | 2000     | 0         | 40  | 10    | 0   | 14     |
| 299    | 785   | 1055     | 0     | 0        | 0         | 38  | 2     | 0   | 14     |
| 299    | 1090  | 1477     | 9     | 1286     | 0         | 39  | 20    | 0   | 8      |
| 347    | 786   | 1090     | 195   | 1032     | 0         | 42  | 26    | 0   | 54     |
| 347    | 686   | 1072     | 377   | 935      | 0         | 41  | 47    | 0   | 123    |
| 301    | 708   | 1105     | 105   | 991      | 0         | 38  | 36    | 0   | 97     |
| 317    | 693   | 1118     | 131   | 1120     | 0         | 38  | 28    | 0   | 74     |
| 306    | 765   | 1071     | 98    | 990      | 0         | 42  | 33    | 0   | 100    |
| 288    | 679   | 1139     | 251   | 1037     | 0         | 41  | 23    | 0   | 93     |
| 315    | 752   | 1055     | 172   | 972      | 0         | 40  | 13    | 0   | 58     |
| 351    | 914   | 1160     | 237   | 1049     | 0         | 40  | 17    | 0   | 49     |
| 354    | 815   | 1110     | 258   | 949      | 0         | 41  | 23    | 0   | 80     |
| 335    | 686   | 1089     | 355   | 947      | 0         | 41  | 18    | 0   | 122    |
| 310    | 764   | 1093     | 284   | 944      | 0         | 39  | 37    | 0   | 115    |
| 336    | 720   | 1079     | 266   | 957      | 0         | 39  | 29    | 0   | 80     |
| 308    | 790   | 1081     | 241   | 837      | 0         | 42  | 25    | 0   | 103    |
| 293    | 687   | 1097     | 311   | 926      | 0         | 40  | 26    | 0   | 104    |
| 311    | 836   | 1110     | 284   | 1011     | 0         | 41  | 24    | 0   | 73     |
| 311    | 1101  | 1375     | 460   | 1136     | 0         | 42  | 15    | 0   | 86     |

| RBC Flag | WBC Flg | RET LD D | SFL | Counter | Monthly | Piercer | Air Pump | Sheath M | Temp REAC |
|----------|---------|----------|-----|---------|---------|---------|----------|----------|-----------|
| 16       | 0       | 5612     | 103 | 57      | 20      | 33      | 57       | 244      | 408       |
| 8        | 0       | 5612     | 103 | 56      | 19      | 32      | 56       | 240      | 408       |
| 5        | 0       | 5612     | 103 | 55      | 18      | 31      | 55       | 236      | 408       |
| 9        | 0       | 5612     | 103 | 54      | 17      | 30      | 54       | 232      | 408       |
| 0        | 0       | 5612     | 103 | 53      | 16      | 29      | 53       | 228      | 408       |
| 6        | 0       | 5612     | 103 | 52      | 15      | 28      | 52       | 224      | 408       |
| 6        | 0       | 5612     | 103 | 51      | 14      | 27      | 51       | 220      | 408       |
| 13       | 0       | 5551     | 103 | 50      | 13      | 26      | 50       | 216      | 408       |
| 6        | 0       | 5551     | 103 | 49      | 12      | 25      | 49       | 212      | 408       |
| 3        | 3       | 5551     | 103 | 48      | 11      | 24      | 48       | 208      | 408       |
| 59       | 0       | 5368     | 103 | 72      | 33      | 46      | 72       | 306      | 408       |
| 8        | 0       | 5307     | 103 | 71      | 32      | 45      | 71       | 302      | 408       |
| 0        | 0       | 5368     | 103 | 70      | 31      | 44      | 70       | 298      | 408       |
| 10       | 0       | 5307     | 103 | 69      | 30      | 43      | 69       | 294      | 405       |
| 7        | 0       | 5307     | 103 | 68      | 29      | 42      | 68       | 290      | 408       |
| 8        | 0       | 5307     | 103 | 67      | 28      | 41      | 67       | 286      | 408       |
| 3        | 0       | 5307     | 103 | 66      | 27      | 40      | 66       | 282      | 408       |
| 5        | 0       | 5307     | 103 | 65      | 26      | 39      | 65       | 278      | 408       |
| 8        | 3       | 5307     | 103 | 64      | 25      | 38      | 64       | 274      | 408       |
| 10       | 0       | 5307     | 103 | 63      | 24      | 37      | 63       | 270      | 408       |
| 0        | 0       | 5490     | 103 | 87      | 45      | 58      | 87       | 369      | 408       |
| 8        | 0       | 5490     | 103 | 86      | 44      | 57      | 86       | 365      | 408       |
| 7        | 0       | 5490     | 103 | 85      | 43      | 56      | 85       | 361      | 408       |
| 12       | 0       | 5490     | 103 | 84      | 42      | 55      | 84       | 357      | 408       |
| 0        | 0       | 5490     | 103 | 83      | 41      | 54      | 83       | 353      | 408       |
| 3        | 0       | 5490     | 103 | 82      | 40      | 53      | 82       | 349      | 408       |
| 7        | 0       | 5490     | 103 | 81      | 39      | 52      | 81       | 345      | 408       |
| 8        | 0       | 5490     | 103 | 80      | 38      | 51      | 80       | 341      | 408       |
| 8        | 0       | 5490     | 103 | 79      | 37      | 50      | 79       | 337      | 408       |
| 9        | 0       | 5307     | 103 | 96      | 53      | 66      | 96       | 406      | 408       |
| 9        | 0       | 5307     | 103 | 95      | 52      | 65      | 95       | 402      | 408       |
| 4        | 0       | 5246     | 103 | 94      | 51      | 64      | 94       | 398      | 408       |
| 13       | 0       | 5246     | 103 | 93      | 50      | 63      | 93       | 394      | 408       |
| 16       | 0       | 5246     | 103 | 92      | 49      | 62      | 92       | 390      | 408       |
| 4        | 0       | 5246     | 103 | 91      | 48      | 61      | 91       | 386      | 408       |
| 5        | 0       | 5246     | 103 | 90      | 47      | 60      | 90       | 382      | 408       |
| 0        | 0       | 5246     | 103 | 89      | 46      | 59      | 89       | 378      | 405       |
| 15       | 0       | 5307     | 103 | 108     | 9       | 75      | 108      | 459      | 408       |
| 9        | 0       | 5246     | 103 | 107     | 8       | 74      | 107      | 455      | 405       |
| 12       | 0       | 5246     | 103 | 106     | 7       | 73      | 106      | 451      | 408       |
| 14       | 0       | 5246     | 103 | 105     | 6       | 72      | 105      | 447      | 408       |
| 10       | 0       | 5246     | 103 | 104     | 5       | 71      | 104      | 443      | 408       |
| 2        | 0       | 5246     | 103 | 103     | 4       | 70      | 103      | 439      | 408       |
| 7        | 0       | 5246     | 103 | 102     | 3       | 69      | 102      | 435      | 408       |
| 9        | 0       | 5246     | 103 | 101     | 2       | 68      | 101      | 431      | 405       |
| 5        | 3       | 5429     | 103 | 118     | 17      | 83      | 118      | 501      | 408       |
| 9        | 0       | 5429     | 103 | 117     | 16      | 82      | 117      | 497      | 408       |
| 20       | 0       | 5429     | 103 | 116     | 15      | 81      | 116      | 493      | 408       |
| 29       | 0       | 5368     | 103 | 115     | 14      | 80      | 115      | 489      | 405       |
| 16       | 0       | 5368     | 103 | 114     | 13      | 79      | 114      | 485      | 408       |
| 7        | 0       | 5368     | 103 | 113     | 12      | 78      | 113      | 481      | 408       |
| 8        | 0       | 5368     | 103 | 112     | 11      | 77      | 112      | 477      | 405       |
| 14       | 0       | 5368     | 103 | 111     | 10      | 76      | 111      | 473      | 405       |

| Tmp REAG | Tmp REAG | Tmp FCM | Tmp ENV | PRS07-1 | PRS07-2 | PRS07-3 | VAC240-1 | VAC240-2 | VAC240-3 |
|----------|----------|---------|---------|---------|---------|---------|----------|----------|----------|
| 408      | 408      | 248     | 259     | 553     | 0       | 0       | 327      | 0        | 0        |
| 408      | 408      | 248     | 259     | 563     | 0       | 0       | 327      | 0        | 0        |
| 408      | 403      | 248     | 259     | 553     | 0       | 0       | 327      | 0        | 0        |
| 408      | 408      | 248     | 259     | 563     | 0       | 0       | 327      | 0        | 0        |
| 410      | 408      | 245     | 256     | 563     | 0       | 0       | 327      | 0        | 0        |
| 408      | 408      | 245     | 256     | 553     | 0       | 0       | 327      | 0        | 0        |
| 408      | 412      | 245     | 256     | 553     | 0       | 0       | 327      | 0        | 0        |
| 410      | 408      | 245     | 254     | 563     | 0       | 0       | 327      | 0        | 0        |
| 408      | 410      | 245     | 254     | 563     | 0       | 0       | 327      | 0        | 0        |
| 410      | 408      | 245     | 252     | 563     | 0       | 0       | 327      | 0        | 0        |
| 417      | 417      | 212     | 222     | 553     | 0       | 0       | 327      | 0        | 0        |
| 417      | 421      | 209     | 220     | 563     | 0       | 0       | 327      | 0        | 0        |
| 417      | 419      | 209     | 220     | 563     | 0       | 0       | 327      | 0        | 0        |
| 421      | 417      | 209     | 218     | 572     | 0       | 0       | 327      | 0        | 0        |
| 421      | 419      | 209     | 218     | 572     | 0       | 0       | 327      | 0        | 0        |
| 421      | 421      | 209     | 215     | 563     | 0       | 0       | 327      | 0        | 0        |
| 424      | 421      | 209     | 215     | 572     | 0       | 0       | 327      | 0        | 0        |
| 419      | 419      | 209     | 213     | 572     | 0       | 0       | 327      | 0        | 0        |
| 421      | 421      | 209     | 213     | 563     | 0       | 0       | 322      | 0        | 0        |
| 417      | 421      | 212     | 213     | 563     | 0       | 0       | 322      | 0        | 0        |
| 412      | 412      | 232     | 243     | 553     | 0       | 0       | 327      | 0        | 0        |
| 412      | 410      | 232     | 243     | 553     | 0       | 0       | 327      | 0        | 0        |
| 412      | 410      | 232     | 240     | 553     | 0       | 0       | 327      | 0        | 0        |
| 410      | 410      | 230     | 240     | 553     | 0       | 0       | 327      | 0        | 0        |
| 410      | 412      | 230     | 240     | 553     | 0       | 0       | 327      | 0        | 0        |
| 414      | 410      | 230     | 238     | 553     | 0       | 0       | 327      | 0        | 0        |
| 414      | 412      | 230     | 238     | 553     | 0       | 0       | 327      | 0        | 0        |
| 414      | 412      | 230     | 238     | 553     | 0       | 0       | 322      | 0        | 0        |
| 414      | 414      | 232     | 236     | 563     | 0       | 0       | 322      | 0        | 0        |
| 424      | 419      | 207     | 208     | 572     | 0       | 0       | 327      | 0        | 0        |
| 421      | 424      | 205     | 208     | 563     | 0       | 0       | 327      | 0        | 0        |
| 421      | 424      | 205     | 206     | 563     | 0       | 0       | 327      | 0        | 0        |
| 421      | 424      | 205     | 206     | 572     | 0       | 0       | 327      | 0        | 0        |
| 421      | 421      | 205     | 204     | 582     | 0       | 0       | 327      | 0        | 0        |
| 419      | 424      | 205     | 204     | 563     | 0       | 0       | 327      | 0        | 0        |
| 424      | 426      | 207     | 201     | 563     | 0       | 0       | 327      | 0        | 0        |
| 417      | 419      | 203     | 211     | 572     | 0       | 0       | 327      | 0        | 0        |
| 417      | 417      | 203     | 211     | 563     | 0       | 0       | 327      | 0        | 0        |
| 419      | 421      | 203     | 208     | 563     | 0       | 0       | 327      | 0        | 0        |
| 419      | 421      | 200     | 208     | 572     | 0       | 0       | 327      | 0        | 0        |
| 419      | 419      | 200     | 206     | 563     | 0       | 0       | 327      | 0        | 0        |
| 419      | 421      | 200     | 204     | 582     | 0       | 0       | 327      | 0        | 0        |
| 421      | 424      | 203     | 204     | 563     | 0       | 0       | 322      | 0        | 0        |
| 421      | 424      | 203     | 204     | 563     | 0       | 0       | 327      | 0        | 0        |
| 412      | 414      | 225     | 236     | 553     | 0       | 0       | 327      | 0        | 0        |
| 412      | 414      | 225     | 236     | 563     | 0       | 0       | 327      | 0        | 0        |
| 412      | 414      | 225     | 234     | 553     | 0       | 0       | 322      | 0        | 0        |
| 417      | 412      | 225     | 231     | 553     | 0       | 0       | 322      | 0        | 0        |
| 417      | 419      | 223     | 231     | 572     | 0       | 0       | 327      | 0        | 0        |
| 417      | 417      | 223     | 229     | 563     | 0       | 0       | 327      | 0        | 0        |
| 417      | 419      | 223     | 229     | 563     | 0       | 0       | 327      | 0        | 0        |
| 417      | 419      | 223     | 227     | 563     | 0       | 0       | 327      | 0        | 0        |

| Laser Tir | Aspiratic | Aspiratic | Aspiratic | LyMoBound | NeEoBound | LyGsBound | LyNeBound | NeMoBound | GsNeBound |
|-----------|-----------|-----------|-----------|-----------|-----------|-----------|-----------|-----------|-----------|
| 1835      | 3212      | 6995      | 8735      | 15        | 0         | 0         | 62        | 0         | 0         |
| 1797      | 3199      | 7044      | 9271      | 37        | 0         | 0         | 4         | 0         | 0         |
| 1759      | 3195      | 7099      | 9456      | 50        | 0         | 0         | 20        | 0         | 1         |
| 1720      | 3199      | 5590      | 8907      | 23        | 0         | 0         | 17        | 0         | 1         |
| 1682      | 3167      | 7115      | 9481      | 18        | 0         | 0         | 9         | 0         | 2         |
| 1644      | 3174      | 7066      | 9465      | 13        | 1         | 0         | 0         | 0         | 0         |
| 1606      | 3155      | 7062      | 9567      | 15        | 0         | 0         | 0         | 0         | 1         |
| 1567      | 3146      | 7056      | 9157      | 26        | 0         | 0         | 6         | 0         | 3         |
| 1529      | 3138      | 7376      | 9469      | 53        | 0         | 0         | 25        | 0         | 2         |
| 1491      | 3127      | 7115      | 9586      | 41        | 1         | 0         | 20        | 0         | 2         |
| 2409      | 2737      | 6901      | 8893      | 4         | 4         | 0         | 6         | 0         | 0         |
| 2370      | 2714      | 6695      | 8413      | 0         | 0         | 0         | 3         | 0         | 0         |
| 2332      | 2708      | 6766      | 7973      | 9         | 0         | 0         | 10        | 0         | 0         |
| 2294      | 2717      | 7375      | 8382      | 2         | 0         | 0         | 1         | 0         | 0         |
| 2256      | 2696      | 6167      | 7716      | 15        | 0         | 0         | 43        | 10        | 0         |
| 2217      | 2689      | 6686      | 8289      | 3         | 0         | 0         | 0         | 0         | 0         |
| 2179      | 2682      | 6858      | 8185      | 7         | 0         | 0         | 0         | 0         | 0         |
| 2141      | 2683      | 6684      | 8043      | 3         | 0         | 0         | 0         | 0         | 0         |
| 2102      | 2684      | 8052      | 9288      | 1         | 0         | 0         | 0         | 0         | 0         |
| 2064      | 2649      | 8176      | 9097      | 2         | 0         | 0         | 1         | 0         | 0         |
| 2981      | 3039      | 7656      | 9220      | 3         | 0         | 0         | 1         | 0         | 0         |
| 2943      | 3040      | 7136      | 8573      | 9         | 0         | 0         | 2         | 0         | 0         |
| 2905      | 3022      | 6859      | 7758      | 3         | 0         | 0         | 3         | 0         | 0         |
| 2867      | 3034      | 7109      | 8420      | 3         | 0         | 0         | 2         | 0         | 0         |
| 2828      | 3020      | 7013      | 8038      | 5         | 0         | 0         | 0         | 0         | 0         |
| 2790      | 3004      | 7413      | 8688      | 8         | 0         | 0         | 3         | 0         | 0         |
| 2752      | 3004      | 6752      | 8078      | 7         | 0         | 0         | 3         | 0         | 0         |
| 2713      | 3005      | 7443      | 8884      | 4         | 0         | 0         | 2         | 0         | 0         |
| 2675      | 2965      | 8306      | 9411      | 4         | 0         | 0         | 0         | 0         | 0         |
| 3326      | 2640      | 6020      | 7321      | 10        | 0         | 0         | 15        | 0         | 0         |
| 3288      | 2630      | 5443      | 6426      | 16        | 0         | 0         | 7         | 0         | 0         |
| 3250      | 2613      | 6099      | 7468      | 1         | 0         | 0         | 15        | 0         | 0         |
| 3211      | 2620      | 5930      | 6957      | 1         | 0         | 0         | 7         | 1         | 0         |
| 3173      | 2608      | 6430      | 8065      | 21        | 0         | 0         | 10        | 0         | 0         |
| 3135      | 2606      | 6129      | 7514      | 4         | 0         | 0         | 1         | 0         | 0         |
| 3096      | 2629      | 6672      | 8299      | 1         | 0         | 0         | 15        | 1         | 0         |
| 3058      | 2586      | 7035      | 8961      | 5         | 0         | 0         | 1         | 0         | 0         |
| 3784      | 2677      | 6486      | 8181      | 26        | 0         | 0         | 17        | 0         | 2         |
| 3746      | 2672      | 5764      | 7405      | 40        | 0         | 0         | 46        | 0         | 3         |
| 3708      | 2650      | 5823      | 7908      | 45        | 0         | 0         | 65        | 0         | 3         |
| 3669      | 2641      | 5860      | 7653      | 30        | 0         | 0         | 6         | 0         | 0         |
| 3631      | 2639      | 6234      | 7990      | 35        | 2         | 0         | 72        | 0         | 2         |
| 3593      | 2626      | 6135      | 7634      | 23        | 0         | 0         | 18        | 0         | 1         |
| 3554      | 2638      | 6425      | 8003      | 13        | 0         | 0         | 24        | 0         | 0         |
| 3516      | 2593      | 7043      | 9104      | 13        | 0         | 0         | 11        | 0         | 0         |
| 4166      | 3020      | 6639      | 8838      | 17        | 0         | 0         | 6         | 0         | 3         |
| 4128      | 3009      | 5900      | 7878      | 52        | 0         | 0         | 28        | 0         | 0         |
| 4090      | 2995      | 7041      | 9091      | 52        | 0         | 0         | 50        | 0         | 3         |
| 4051      | 2984      | 6374      | 8190      | 32        | 1         | 0         | 26        | 0         | 0         |
| 4013      | 2956      | 6970      | 9010      | 38        | 0         | 0         | 21        | 0         | 1         |
| 3975      | 2949      | 6424      | 8334      | 32        | 0         | 0         | 4         | 0         | 1         |
| 3936      | 2936      | 7605      | 9356      | 11        | 1         | 0         | 16        | 0         | 1         |
| 3898      | 2882      | 7670      | 9248      | 16        | 0         | 0         | 9         | 0         | 5         |

| MoEoBound | GsEoBound | GsBaBound | NeBaBound | LyBaBound | EoBaBoundaryCount |
|-----------|-----------|-----------|-----------|-----------|-------------------|
| 0         | 0         | 0         | 6         | 5         | 0                 |
| 0         | 0         | 0         | 9         | 13        | 0                 |
| 0         | 0         | 0         | 5         | 30        | 0                 |
| 0         | 0         | 0         | 1         | 2         | 0                 |
| 0         | 0         | 0         | 7         | 10        | 0                 |
| 0         | 0         | 0         | 6         | 4         | 0                 |
| 0         | 0         | 0         | 8         | 13        | 0                 |
| 0         | 0         | 0         | 1         | 1         | 0                 |
| 0         | 0         | 0         | 0         | 1         | 0                 |
| 0         | 0         | 0         | 1         | 12        | 0                 |
| 0         | 1         | 0         | 0         | 0         | 0                 |
| 0         | 0         | 0         | 0         | 0         | 0                 |
| 0         | 0         | 0         | 0         | 0         | 0                 |
| 0         | 0         | 0         | 0         | 0         | 0                 |
| 0         | 0         | 0         | 0         | 8         | 0                 |
| 0         | 0         | 0         | 0         | 0         | 0                 |
| 0         | 0         | 0         | 1         | 1         | 0                 |
| 0         | 0         | 0         | 0         | 0         | 0                 |
| 0         | 0         | 0         | 1         | 0         | 0                 |
| 0         | 0         | 0         | 0         | 0         | 0                 |
| 0         | 0         | 0         | 0         | 0         | 0                 |
| 0         | 0         | 0         | 0         | 0         | 0                 |
| 0         | 0         | 0         | 0         | 1         | 0                 |
| 0         | 0         | 0         | 0         | 0         | 0                 |
| 0         | 0         | 0         | 2         | 1         | 0                 |
| 0         | 0         | 0         | 0         | 2         | 0                 |
| 0         | 0         | 0         | 0         | 0         | 0                 |
| 0         | 0         | 0         | 0         | 0         | 0                 |
| 0         | 0         | 0         | 0         | 0         | 0                 |
| 0         | 0         | 0         | 0         | 0         | 0                 |
| 0         | 0         | 0         | 0         | 0         | 0                 |
| 0         | 0         | 0         | 0         | 0         | 0                 |
| 0         | 0         | 0         | 0         | 0         | 0                 |
| 0         | 0         | 0         | 0         | 0         | 0                 |
| 0         | 0         | 0         | 0         | 0         | 0                 |
| 0         | 0         | 0         | 0         | 0         | 0                 |
| 0         | 0         | 0         | 0         | 0         | 0                 |
| 0         | 0         | 0         | 0         | 0         | 0                 |
| 0         | 0         | 0         | 0         | 1         | 0                 |
| 0         | 0         | 0         | 2         | 2         | 0                 |
| 0         | 0         | 0         | 0         | 0         | 0                 |
| 0         | 0         | 0         | 4         | 10        | 0                 |
| 0         | 0         | 0         | 0         | 3         | 0                 |
| 0         | 0         | 0         | 6         | 7         | 0                 |
| 0         | 0         | 0         | 0         | 0         | 0                 |
| 0         | 0         | 0         | 1         | 0         | 0                 |
| 0         | 0         | 0         | 4         | 12        | 0                 |
| 0         | 0         | 0         | 4         | 17        | 0                 |
| 0         | 0         | 0         | 0         | 1         | 0                 |
| 0         | 0         | 0         | 2         | 4         | 0                 |
| 0         | 0         | 0         | 2         | 7         | 0                 |
| 0         | 0         | 0         | 19        | 36        | 0                 |
| 0         | 0         | 0         | 1         | 1         | 0                 |
| 0         | 0         | 0         | 1         | 1         | 0                 |
